# Supplementary material for: Characterizing the Properties of Anion-Binding Bis(cyclopeptides) with Solvent-Independent Energy Increments
Source: MDPI journal article supplement (doi:10.3390/chemistry4020031), 2022-05-12
Supplement: s1 [file s1]

**Characterizing the properties of anion-binding bis(cyclopeptides) with solvent-independent energy increments**

Stefan Kubik <sup>1,\*</sup>

<sup>1</sup> *Fachbereich Chemie - Organische Chemie, Technische Universität Kaiserslautern, Erwin-Schrödinger-Straße, 67663 Kaiserslautern, Germany.*

**CONTENT**

|                                                                                      |     |
|--------------------------------------------------------------------------------------|-----|
| Table S1: Overview of Dataset Used for the Analysis .....                            | S2  |
| Table S2: Polynomial Fits of Transfer Energies and Solvent Property Parameters ..... | S7  |
| Table S3: Comparison of the Experimental and Calculated Gibbs free Energies .....    | S15 |
| References .....                                                                     | S24 |

**Table S1.** Overview of Dataset Used for the Analysis

| Entry | Comp.     | No. of Linkers | Solvent                             | vol% Water | mol% Water | Anion                         | Method | log $K_a$ | $T / K$ | $\Delta G^\circ_{\text{exp}}{}^a$ | Ref. | $\Delta G^\circ_{\text{tr}}{}^a$ | $\alpha$ | $\beta$ | $\pi^*$ | $E_T(30)$ |
|-------|-----------|----------------|-------------------------------------|------------|------------|-------------------------------|--------|-----------|---------|-----------------------------------|------|----------------------------------|----------|---------|---------|-----------|
| 1     | <b>1d</b> | 1              | D <sub>2</sub> O/CD <sub>3</sub> OD | 50.0       | 69.0       | SO <sub>4</sub> <sup>2-</sup> | NMR    | 5.54      | 298     | -31.6                             | [1]  | 11.67                            | 1.00     | 0.68    | 1.02    | 58.42     |
| 2     | <b>1d</b> | 1              | D <sub>2</sub> O/CD <sub>3</sub> OD | 50.0       | 69.0       | I <sup>-</sup>                | NMR    | 3.95      | 298     | -22.5                             |      | 0.32                             | 1.00     | 0.68    | 1.02    | 58.42     |
| 3     | <b>1d</b> | 1              | D <sub>2</sub> O/CD <sub>3</sub> OD | 50.0       | 69.0       | I <sup>-</sup>                | NMR    | 4.04      | 298     | -23.0                             |      | 0.32                             | 1.00     | 0.68    | 1.02    | 58.42     |
| 4     | <b>1d</b> | 1              | D <sub>2</sub> O/CD <sub>3</sub> OD | 50.0       | 69.0       | I <sup>-</sup>                | NMR    | 4.05      | 298     | -23.1                             |      | 0.32                             | 1.00     | 0.68    | 1.02    | 58.42     |
| 5     | <b>1d</b> | 1              | D <sub>2</sub> O/CD <sub>3</sub> OD | 50.0       | 69.0       | Br <sup>-</sup>               | NMR    | 3.72      | 298     | -21.2                             |      | 1.77                             | 1.00     | 0.68    | 1.02    | 58.42     |
| 6     | <b>1d</b> | 1              | D <sub>2</sub> O/CD <sub>3</sub> OD | 50.0       | 69.0       | Cl <sup>-</sup>               | NMR    | 2.85      | 298     | -16.3                             |      | 2.89                             | 1.00     | 0.68    | 1.02    | 58.42     |
| 7     | <b>1d</b> | 1              | D <sub>2</sub> O/CD <sub>3</sub> OD | 50.0       | 69.0       | NO <sub>3</sub> <sup>-</sup>  | NMR    | 2.11      | 298     | -12.0                             |      | 1.48                             | 1.00     | 0.68    | 1.02    | 58.42     |
| 8     | <b>1d</b> | 1              | H <sub>2</sub> O/CH <sub>3</sub> OH | 50.0       | 69.2       | SO <sub>4</sub> <sup>2-</sup> | ITC    | 4.55      | 298     | -26.0                             |      | 11.56                            | 1.00     | 0.68    | 1.02    | 58.44     |
| 9     | <b>1d</b> | 1              | H <sub>2</sub> O/CH <sub>3</sub> OH | 50.0       | 69.2       | I <sup>-</sup>                | ITC    | 3.79      | 298     | -21.6                             |      | 0.31                             | 1.00     | 0.68    | 1.02    | 58.44     |
| 10    | <b>1d</b> | 1              | H <sub>2</sub> O/CH <sub>3</sub> OH | 50.0       | 69.2       | I <sup>-</sup>                | ITC    | 3.51      | 298     | -20.0                             |      | 0.31                             | 1.00     | 0.68    | 1.02    | 58.44     |
| 11    | <b>1d</b> | 1              | H <sub>2</sub> O/CH <sub>3</sub> OH | 50.0       | 69.2       | Br <sup>-</sup>               | ITC    | 3.45      | 298     | -19.7                             |      | 1.75                             | 1.00     | 0.68    | 1.02    | 58.44     |
| 12    | <b>1d</b> | 1              | H <sub>2</sub> O/CH <sub>3</sub> OH | 50.0       | 69.2       | Cl <sup>-</sup>               | ITC    | 2.51      | 298     | -14.3                             |      | 2.86                             | 1.00     | 0.68    | 1.02    | 58.44     |
| 13    | <b>1d</b> | 1              | H <sub>2</sub> O/CH <sub>3</sub> CN | 33.3       | 59.1       | I <sup>-</sup>                | ITC    | 3.52      | 298     | -20.1                             | [2]  | 6.54                             | 0.88     | 0.60    | 0.87    | 55.80     |
| 14    | <b>1d</b> | 1              | H <sub>2</sub> O/CH <sub>3</sub> CN | 33.3       | 59.1       | SO <sub>4</sub> <sup>2-</sup> | ITC    | 5.30      | 298     | -30.2                             |      | n.a. <sup>b</sup>                | 0.88     | 0.60    | 0.87    | 55.80     |
| 15    | <b>1j</b> | 1              | H <sub>2</sub> O/CH <sub>3</sub> CN | 33.0       | 58.8       | I <sup>-</sup>                | ITC    | 4.46      | 298     | -25.4                             |      | 6.57                             | 0.88     | 0.60    | 0.86    | 55.79     |
| 16    | <b>1j</b> | 1              | H <sub>2</sub> O/CH <sub>3</sub> CN | 33.0       | 58.8       | SO <sub>4</sub> <sup>2-</sup> | ITC    | 6.73      | 298     | -38.4                             |      | n.a.                             | 0.88     | 0.60    | 0.86    | 55.79     |
| 17    | <b>1l</b> | 1              | H <sub>2</sub> O/CH <sub>3</sub> CN | 33.0       | 58.8       | I <sup>-</sup>                | ITC    | 4.75      | 298     | -27.1                             |      | 6.57                             | 0.88     | 0.60    | 0.86    | 55.79     |
| 18    | <b>1l</b> | 1              | H <sub>2</sub> O/CH <sub>3</sub> CN | 33.0       | 58.8       | SO <sub>4</sub> <sup>2-</sup> | ITC    | 6.83      | 298     | -39.0                             |      | n.a.                             | 0.88     | 0.60    | 0.86    | 55.79     |
| 19    | <b>1l</b> | 1              | H <sub>2</sub> O/CH <sub>3</sub> CN | 58.0       | 80.0       | I <sup>-</sup>                | ITC    | 4.65      | 298     | -26.5                             | [3]  | 4.16                             | 0.97     | 0.61    | 0.99    | 57.66     |
| 20    | <b>1l</b> | 1              | H <sub>2</sub> O/CH <sub>3</sub> CN | 50.0       | 74.3       | I <sup>-</sup>                | ITC    | 4.73      | 298     | -27.0                             |      | 4.87                             | 0.94     | 0.61    | 0.95    | 56.87     |
| 21    | <b>1l</b> | 1              | H <sub>2</sub> O/CH <sub>3</sub> CN | 33.0       | 58.8       | I <sup>-</sup>                | ITC    | 4.85      | 298     | -27.7                             |      | 6.57                             | 0.88     | 0.60    | 0.86    | 55.79     |
| 22    | <b>1l</b> | 1              | H <sub>2</sub> O/CH <sub>3</sub> CN | 25.0       | 49.1       | I <sup>-</sup>                | ITC    | 4.99      | 298     | -28.5                             |      | 7.79                             | 0.86     | 0.59    | 0.84    | 55.59     |
| 23    | <b>1l</b> | 1              | H <sub>2</sub> O/CH <sub>3</sub> CN | 70.0       | 87.1       | SO <sub>4</sub> <sup>2-</sup> | ITC    | 5.45      | 298     | -31.1                             |      | n.a.                             | 1.02     | 0.62    | 1.04    | 59.07     |
| 24    | <b>1l</b> | 1              | H <sub>2</sub> O/CH <sub>3</sub> CN | 58.0       | 80.0       | SO <sub>4</sub> <sup>2-</sup> | ITC    | 5.91      | 298     | -33.7                             |      | n.a.                             | 0.97     | 0.61    | 0.99    | 57.66     |
| 25    | <b>1l</b> | 1              | H <sub>2</sub> O/CH <sub>3</sub> CN | 50.0       | 74.3       | SO <sub>4</sub> <sup>2-</sup> | ITC    | 6.06      | 298     | -34.6                             |      | n.a.                             | 0.94     | 0.61    | 0.95    | 56.87     |

|    |           |   |                                     |      |      |                                |     |      |     |       |     |       |      |      |      |       |
|----|-----------|---|-------------------------------------|------|------|--------------------------------|-----|------|-----|-------|-----|-------|------|------|------|-------|
| 26 | <b>1l</b> | 1 | H <sub>2</sub> O/CH <sub>3</sub> CN | 33.0 | 58.8 | SO <sub>4</sub> <sup>2-</sup>  | ITC | 6.83 | 298 | -39.0 |     | n.a.  | 0.88 | 0.60 | 0.86 | 55.79 |
| 27 | <b>1l</b> | 1 | H <sub>2</sub> O/CH <sub>3</sub> CN | 25.0 | 49.1 | SO <sub>4</sub> <sup>2-</sup>  | ITC | 7.29 | 298 | -41.6 |     | n.a.  | 0.86 | 0.59 | 0.84 | 55.59 |
| 28 | <b>1d</b> | 1 | H <sub>2</sub> O/CH <sub>3</sub> OH | 50.0 | 69.2 | I <sup>-</sup>                 | ITC | 3.79 | 298 | -21.6 |     | 0.31  | 1.00 | 0.68 | 1.02 | 58.44 |
| 29 | <b>1f</b> | 1 | H <sub>2</sub> O/CH <sub>3</sub> OH | 50.0 | 69.2 | SO <sub>4</sub> <sup>2-</sup>  | ITC | 5.10 | 298 | -29.1 |     | 11.56 | 1.00 | 0.68 | 1.02 | 58.44 |
| 30 | <b>1f</b> | 1 | H <sub>2</sub> O/CH <sub>3</sub> OH | 50.0 | 69.2 | I <sup>-</sup>                 | ITC | 4.00 | 298 | -22.8 |     | 0.31  | 1.00 | 0.68 | 1.02 | 58.44 |
| 31 | <b>1f</b> | 1 | H <sub>2</sub> O/CH <sub>3</sub> OH | 50.0 | 69.2 | Br <sup>-</sup>                | ITC | 3.30 | 298 | -18.8 |     | 1.75  | 1.00 | 0.68 | 1.02 | 58.44 |
| 32 | <b>1f</b> | 1 | H <sub>2</sub> O/CH <sub>3</sub> OH | 50.0 | 69.2 | Cl <sup>-</sup>                | ITC | 1.86 | 298 | -10.6 |     | 2.86  | 1.00 | 0.68 | 1.02 | 58.44 |
| 33 | <b>1g</b> | 1 | H <sub>2</sub> O/CH <sub>3</sub> OH | 50.0 | 69.2 | SO <sub>4</sub> <sup>2-</sup>  | ITC | 5.32 | 298 | -30.3 |     | 11.56 | 1.00 | 0.68 | 1.02 | 58.44 |
| 34 | <b>1g</b> | 1 | H <sub>2</sub> O/CH <sub>3</sub> OH | 50.0 | 69.2 | I <sup>-</sup>                 | ITC | 3.61 | 298 | -20.6 | [4] | 0.31  | 1.00 | 0.68 | 1.02 | 58.44 |
| 35 | <b>1g</b> | 1 | H <sub>2</sub> O/CH <sub>3</sub> OH | 50.0 | 69.2 | Br <sup>-</sup>                | ITC | 3.03 | 298 | -17.3 |     | 1.75  | 1.00 | 0.68 | 1.02 | 58.44 |
| 36 | <b>1c</b> | 1 | H <sub>2</sub> O/CH <sub>3</sub> OH | 50.0 | 69.2 | SO <sub>4</sub> <sup>2-</sup>  | ITC | 5.97 | 298 | -34.1 |     | 11.56 | 1.00 | 0.68 | 1.02 | 58.44 |
| 37 | <b>1c</b> | 1 | H <sub>2</sub> O/CH <sub>3</sub> OH | 50.0 | 69.2 | I <sup>-</sup>                 | ITC | 4.43 | 298 | -25.3 |     | 0.31  | 1.00 | 0.68 | 1.02 | 58.44 |
| 38 | <b>1c</b> | 1 | H <sub>2</sub> O/CH <sub>3</sub> OH | 50.0 | 69.2 | Br <sup>-</sup>                | ITC | 4.01 | 298 | -22.9 |     | 1.75  | 1.00 | 0.68 | 1.02 | 58.44 |
| 39 | <b>1c</b> | 1 | H <sub>2</sub> O/CH <sub>3</sub> OH | 50.0 | 69.2 | Cl <sup>-</sup>                | ITC | 3.39 | 298 | -19.3 |     | 2.86  | 1.00 | 0.68 | 1.02 | 58.44 |
| 40 | <b>1c</b> | 1 | H <sub>2</sub> O/CH <sub>3</sub> CN | 33.0 | 58.8 | SO <sub>4</sub> <sup>2-</sup>  | ITC | 5.75 | 298 | -32.8 |     | n.a.  | 0.88 | 0.60 | 0.86 | 55.79 |
| 41 | <b>1c</b> | 1 | H <sub>2</sub> O/CH <sub>3</sub> CN | 33.0 | 58.8 | I <sup>-</sup>                 | ITC | 4.05 | 298 | -23.1 |     | 6.57  | 0.88 | 0.60 | 0.86 | 55.79 |
| 42 | <b>1h</b> | 1 | H <sub>2</sub> O/CH <sub>3</sub> OH | 50.0 | 69.2 | SO <sub>4</sub> <sup>2-</sup>  | ITC | 3.87 | 298 | -22.1 | [5] | 11.56 | 1.00 | 0.68 | 1.02 | 58.44 |
| 43 | <b>1h</b> | 1 | H <sub>2</sub> O/CH <sub>3</sub> OH | 50.0 | 69.2 | I <sup>-</sup>                 | ITC | 2.68 | 298 | -15.3 |     | 0.31  | 1.00 | 0.68 | 1.02 | 58.44 |
| 44 | <b>1i</b> | 1 | H <sub>2</sub> O/CH <sub>3</sub> OH | 35.0 | 54.7 | SO <sub>4</sub> <sup>2-</sup>  | ITC | 5.67 | 298 | -32.3 |     | 19.04 | 0.98 | 0.69 | 0.93 | 57.51 |
| 45 | <b>1i</b> | 1 | H <sub>2</sub> O/CH <sub>3</sub> OH | 50.0 | 69.2 | SO <sub>4</sub> <sup>2-</sup>  | ITC | 4.96 | 298 | -28.3 |     | 11.56 | 1.00 | 0.68 | 1.02 | 58.44 |
| 46 | <b>1i</b> | 1 | H <sub>2</sub> O/CH <sub>3</sub> OH | 65.0 | 80.7 | SO <sub>4</sub> <sup>2-</sup>  | ITC | 4.26 | 298 | -24.3 | [6] | 6.56  | 1.05 | 0.65 | 1.07 | 59.59 |
| 47 | <b>3i</b> | 3 | H <sub>2</sub> O/CH <sub>3</sub> OH | 35.0 | 54.7 | SO <sub>4</sub> <sup>2-</sup>  | ITC | 6.34 | 298 | -36.2 |     | 19.04 | 0.98 | 0.69 | 0.93 | 57.51 |
| 48 | <b>3i</b> | 3 | H <sub>2</sub> O/CH <sub>3</sub> OH | 50.0 | 69.2 | SO <sub>4</sub> <sup>2-</sup>  | ITC | 5.70 | 298 | -32.5 |     | 11.56 | 1.00 | 0.68 | 1.02 | 58.44 |
| 49 | <b>3i</b> | 3 | H <sub>2</sub> O/CH <sub>3</sub> OH | 65.0 | 80.7 | SO <sub>4</sub> <sup>2-</sup>  | ITC | 5.19 | 298 | -29.6 |     | 6.56  | 1.05 | 0.65 | 1.07 | 59.59 |
| 50 | <b>1k</b> | 1 | H <sub>2</sub> O/CH <sub>3</sub> CN | 33.0 | 58.8 | I <sup>-</sup>                 | ITC | 4.89 | 298 | -27.9 |     | 6.57  | 0.88 | 0.60 | 0.86 | 55.79 |
| 51 | <b>1k</b> | 1 | H <sub>2</sub> O/CH <sub>3</sub> CN | 33.0 | 58.8 | SO <sub>4</sub> <sup>2-</sup>  | ITC | 6.78 | 298 | -38.7 |     | n.a.  | 0.88 | 0.60 | 0.86 | 55.79 |
| 52 | <b>2k</b> | 2 | H <sub>2</sub> O/CH <sub>3</sub> CN | 33.0 | 58.8 | I <sup>-</sup>                 | ITC | 6.04 | 298 | -34.5 | [7] | 6.57  | 0.88 | 0.60 | 0.86 | 55.79 |
| 53 | <b>2k</b> | 2 | H <sub>2</sub> O/CH <sub>3</sub> CN | 33.0 | 58.8 | SO <sub>4</sub> <sup>2-</sup>  | ITC | 8.67 | 298 | -49.5 |     | n.a.  | 0.88 | 0.60 | 0.86 | 55.79 |
| 54 | <b>2k</b> | 2 | H <sub>2</sub> O/CH <sub>3</sub> CN | 33.0 | 58.8 | SeO <sub>4</sub> <sup>2-</sup> | ITC | 8.04 | 298 | -45.9 |     | n.a.  | 0.88 | 0.60 | 0.86 | 55.79 |

|                 |           |   |                                     |       |       |                                |     |      |     |       |     |       |      |      |      |       |
|-----------------|-----------|---|-------------------------------------|-------|-------|--------------------------------|-----|------|-----|-------|-----|-------|------|------|------|-------|
| 55              | <b>1l</b> | 1 | H <sub>2</sub> O/CH <sub>3</sub> CN | 33.0  | 58.8  | I <sup>-</sup>                 | ITC | 4.75 | 298 | -27.1 |     | 6.57  | 0.88 | 0.60 | 0.86 | 55.79 |
| 56              | <b>1l</b> | 1 | H <sub>2</sub> O/CH <sub>3</sub> CN | 33.0  | 58.8  | SO <sub>4</sub> <sup>2-</sup>  | ITC | 6.83 | 298 | -39.0 |     | n.a.  | 0.88 | 0.60 | 0.86 | 55.79 |
| 57              | <b>2l</b> | 2 | H <sub>2</sub> O/CH <sub>3</sub> CN | 33.0  | 58.8  | I <sup>-</sup>                 | ITC | 5.08 | 298 | -29.0 |     | 6.57  | 0.88 | 0.60 | 0.86 | 55.79 |
| 58              | <b>2l</b> | 2 | H <sub>2</sub> O/CH <sub>3</sub> CN | 33.0  | 58.8  | SO <sub>4</sub> <sup>2-</sup>  | ITC | 7.59 | 298 | -43.3 |     | n.a.  | 0.88 | 0.60 | 0.86 | 55.79 |
| 59              | <b>2l</b> | 2 | H <sub>2</sub> O/CH <sub>3</sub> CN | 33.0  | 58.8  | SeO <sub>4</sub> <sup>2-</sup> | ITC | 6.60 | 298 | -37.7 |     | n.a.  | 0.88 | 0.60 | 0.86 | 55.79 |
| 60              | <b>1b</b> | 1 | H <sub>2</sub> O/CH <sub>3</sub> OH | 30.0  | 49.0  | SO <sub>4</sub> <sup>2-</sup>  | ITC | 6.77 | 298 | -38.6 |     | 22.35 | 0.98 | 0.68 | 0.90 | 57.23 |
| 61              | <b>1b</b> | 1 | H <sub>2</sub> O/CH <sub>3</sub> OH | 50.0  | 69.2  | SO <sub>4</sub> <sup>2-</sup>  | ITC | 5.87 | 298 | -33.5 |     | 11.56 | 1.00 | 0.68 | 1.02 | 58.44 |
| 62              | <b>1b</b> | 1 | H <sub>2</sub> O/CH <sub>3</sub> OH | 70.0  | 84.0  | SO <sub>4</sub> <sup>2-</sup>  | ITC | 5.07 | 298 | -28.9 |     | 5.27  | 1.07 | 0.63 | 1.08 | 60.03 |
| 63              | <b>1b</b> | 1 | H <sub>2</sub> O/CH <sub>3</sub> OH | 95.0  | 97.7  | SO <sub>4</sub> <sup>2-</sup>  | ITC | 3.70 | 298 | -21.1 |     | 0.66  | 1.16 | 0.51 | 1.10 | 62.55 |
| 64              | <b>1b</b> | 1 | H <sub>2</sub> O/CH <sub>3</sub> OH | 20.0  | 36.0  | I <sup>-</sup>                 | ITC | 4.96 | 298 | -28.3 | [8] | 3.07  | 0.99 | 0.67 | 0.82 | 56.68 |
| 65              | <b>1b</b> | 1 | H <sub>2</sub> O/CH <sub>3</sub> OH | 30.0  | 49.0  | I <sup>-</sup>                 | ITC | 4.73 | 298 | -27.0 |     | 1.77  | 0.98 | 0.68 | 0.90 | 57.23 |
| 66              | <b>1b</b> | 1 | H <sub>2</sub> O/CH <sub>3</sub> OH | 50.0  | 69.2  | I <sup>-</sup>                 | ITC | 4.59 | 298 | -26.2 |     | 0.31  | 1.00 | 0.68 | 1.02 | 58.44 |
| 67              | <b>1b</b> | 1 | H <sub>2</sub> O/CH <sub>3</sub> OH | 70.0  | 84.0  | I <sup>-</sup>                 | ITC | 4.43 | 298 | -25.3 |     | -0.19 | 1.07 | 0.63 | 1.08 | 60.03 |
| 68              | <b>1b</b> | 1 | H <sub>2</sub> O/CH <sub>3</sub> OH | 90.0  | 95.3  | I <sup>-</sup>                 | ITC | 4.12 | 298 | -23.5 |     | -0.16 | 1.14 | 0.54 | 1.10 | 62.01 |
| 69              | <b>1b</b> | 1 | H <sub>2</sub> O/CH <sub>3</sub> OH | 95.0  | 97.7  | I <sup>-</sup>                 | ITC | 3.96 | 298 | -22.6 |     | -0.11 | 1.16 | 0.51 | 1.10 | 62.55 |
| 70              | <b>1b</b> | 1 | H <sub>2</sub> O/CH <sub>3</sub> OH | 30.0  | 49.0  | SO <sub>4</sub> <sup>2-</sup>  | ITC | 6.76 | 298 | -38.6 |     | 22.35 | 0.98 | 0.68 | 0.90 | 57.23 |
| 71              | <b>1b</b> | 1 | H <sub>2</sub> O/CH <sub>3</sub> OH | 50.0  | 69.2  | SO <sub>4</sub> <sup>2-</sup>  | ITC | 5.87 | 298 | -33.5 |     | 11.56 | 1.00 | 0.68 | 1.02 | 58.44 |
| 72              | <b>1b</b> | 1 | H <sub>2</sub> O/CH <sub>3</sub> OH | 70.0  | 84.0  | SO <sub>4</sub> <sup>2-</sup>  | ITC | 5.04 | 298 | -28.8 |     | 5.27  | 1.07 | 0.63 | 1.08 | 60.03 |
| 73              | <b>1b</b> | 1 | H <sub>2</sub> O/CH <sub>3</sub> OH | 95.0  | 97.7  | SO <sub>4</sub> <sup>2-</sup>  | ITC | 3.69 | 298 | -21.1 |     | 0.66  | 1.16 | 0.51 | 1.10 | 62.55 |
| 74              | <b>1b</b> | 1 | H <sub>2</sub> O/–                  | 100.0 | 100.0 | SO <sub>4</sub> <sup>2-</sup>  | ITC | 3.49 | 298 | -19.9 |     | 0.00  | 1.17 | 0.47 | 1.09 | 1.09  |
| 75 <sup>c</sup> | <b>1b</b> | 1 | H <sub>2</sub> O/CH <sub>3</sub> OH | 0.0   | 0.0   | I <sup>-</sup>                 | ITC | 6.14 | 298 | -35.0 |     | 7.31  | 1.00 | 0.70 | 0.59 | 55.69 |
| 76 <sup>c</sup> | <b>1b</b> | 1 | H <sub>2</sub> O/CH <sub>3</sub> OH | 0.0   | 0.0   | I <sup>-</sup>                 | ITC | 6.38 | 298 | -36.4 | [9] | 7.31  | 1.00 | 0.70 | 0.59 | 55.69 |
| 77              | <b>1b</b> | 1 | H <sub>2</sub> O/CH <sub>3</sub> OH | 5.0   | 10.6  | I <sup>-</sup>                 | ITC | 5.85 | 298 | -33.4 |     | 6.02  | 1.01 | 0.70 | 0.67 | 55.84 |
| 78              | <b>1b</b> | 1 | H <sub>2</sub> O/CH <sub>3</sub> OH | 10.0  | 20.0  | I <sup>-</sup>                 | ITC | 5.40 | 298 | -30.8 |     | 4.89  | 1.01 | 0.68 | 0.73 | 56.10 |
| 79              | <b>1b</b> | 1 | H <sub>2</sub> O/CH <sub>3</sub> OH | 10.0  | 20.0  | I <sup>-</sup>                 | ITC | 5.53 | 298 | -31.5 |     | 4.89  | 1.01 | 0.68 | 0.73 | 56.10 |
| 80              | <b>1b</b> | 1 | H <sub>2</sub> O/CH <sub>3</sub> OH | 20.0  | 36.0  | I <sup>-</sup>                 | ITC | 4.96 | 298 | -28.3 |     | 3.07  | 0.99 | 0.67 | 0.82 | 56.68 |
| 81              | <b>1b</b> | 1 | H <sub>2</sub> O/CH <sub>3</sub> OH | 30.0  | 49.0  | I <sup>-</sup>                 | ITC | 4.72 | 298 | -26.9 |     | 1.77  | 0.98 | 0.68 | 0.90 | 57.23 |
| 82              | <b>1b</b> | 1 | H <sub>2</sub> O/CH <sub>3</sub> OH | 50.0  | 69.2  | I <sup>-</sup>                 | ITC | 4.59 | 298 | -26.2 |     | 0.31  | 1.00 | 0.68 | 1.02 | 58.44 |
| 83              | <b>1b</b> | 1 | H <sub>2</sub> O/CH <sub>3</sub> OH | 70.0  | 84.0  | I <sup>-</sup>                 | ITC | 4.43 | 298 | -25.3 |     | -0.19 | 1.07 | 0.63 | 1.08 | 60.03 |

|                  |           |   |                                     |       |       |                               |     |      |     |       |       |      |      |      |       |
|------------------|-----------|---|-------------------------------------|-------|-------|-------------------------------|-----|------|-----|-------|-------|------|------|------|-------|
| 84               | <b>1b</b> | 1 | H <sub>2</sub> O/CH <sub>3</sub> OH | 90.0  | 95.3  | I <sup>-</sup>                | ITC | 4.10 | 298 | -23.4 | -0.16 | 1.14 | 0.54 | 1.10 | 62.01 |
| 85               | <b>1b</b> | 1 | H <sub>2</sub> O/CH <sub>3</sub> OH | 95.0  | 97.7  | I <sup>-</sup>                | ITC | 3.96 | 298 | -22.6 | -0.11 | 1.16 | 0.51 | 1.10 | 62.55 |
| 86               | <b>1b</b> | 1 | H <sub>2</sub> O/–                  | 100.0 | 100.0 | I <sup>-</sup>                | ITC | 3.80 | 298 | -21.7 | 0.00  | 1.17 | 0.47 | 1.09 | 1.09  |
| 87               | <b>1b</b> | 1 | H <sub>2</sub> O/CH <sub>3</sub> CN | 30.0  | 55.4  | SO <sub>4</sub> <sup>2-</sup> | ITC | 6.25 | 298 | -35.7 | n.a.  | 0.87 | 0.60 | 0.85 | 55.70 |
| 88               | <b>1b</b> | 1 | H <sub>2</sub> O/CH <sub>3</sub> CN | 50.0  | 74.3  | SO <sub>4</sub> <sup>2-</sup> | ITC | 5.24 | 298 | -29.9 | n.a.  | 0.94 | 0.61 | 0.95 | 56.87 |
| 89               | <b>1b</b> | 1 | H <sub>2</sub> O/CH <sub>3</sub> CN | 70.0  | 87.1  | SO <sub>4</sub> <sup>2-</sup> | ITC | 4.78 | 298 | -27.3 | n.a.  | 1.02 | 0.62 | 1.04 | 59.07 |
| 90               | <b>1b</b> | 1 | H <sub>2</sub> O/CH <sub>3</sub> CN | 80.0  | 92.1  | SO <sub>4</sub> <sup>2-</sup> | ITC | 4.48 | 298 | -25.6 | n.a.  | 1.06 | 0.60 | 1.08 | 60.37 |
| 91               | <b>1b</b> | 1 | H <sub>2</sub> O/CH <sub>3</sub> CN | 95.0  | 98.2  | SO <sub>4</sub> <sup>2-</sup> | ITC | 3.97 | 298 | -22.6 | n.a.  | 1.14 | 0.52 | 1.10 | 62.41 |
| 92 <sup>c</sup>  | <b>1b</b> | 1 | H <sub>2</sub> O/CH <sub>3</sub> CN | 0.0   | 0.0   | I <sup>-</sup>                | ITC | 6.24 | 298 | -35.6 | 20.33 | 0.25 | 0.47 | 0.73 | 45.99 |
| 93 <sup>c</sup>  | <b>1b</b> | 1 | H <sub>2</sub> O/CH <sub>3</sub> CN | 0.0   | 0.0   | I <sup>-</sup>                | ITC | 6.25 | 298 | -35.7 | 20.33 | 0.25 | 0.47 | 0.73 | 45.99 |
| 94               | <b>1b</b> | 1 | H <sub>2</sub> O/CH <sub>3</sub> CN | 5.0   | 13.2  | I <sup>-</sup>                | ITC | 5.55 | 298 | -31.7 | 15.85 | 0.61 | 0.55 | 0.75 | 51.91 |
| 95               | <b>1b</b> | 1 | H <sub>2</sub> O/CH <sub>3</sub> CN | 20.0  | 42.0  | I <sup>-</sup>                | ITC | 4.74 | 298 | -27.0 | 8.89  | 0.83 | 0.59 | 0.83 | 55.47 |
| 96               | <b>1b</b> | 1 | H <sub>2</sub> O/CH <sub>3</sub> CN | 20.0  | 42.0  | I <sup>-</sup>                | ITC | 4.72 | 298 | -26.9 | 8.89  | 0.83 | 0.59 | 0.83 | 55.47 |
| 97               | <b>1b</b> | 1 | H <sub>2</sub> O/CH <sub>3</sub> CN | 30.0  | 55.4  | I <sup>-</sup>                | ITC | 4.35 | 298 | -24.8 | 6.97  | 0.87 | 0.60 | 0.85 | 55.70 |
| 98               | <b>1b</b> | 1 | H <sub>2</sub> O/CH <sub>3</sub> CN | 50.0  | 74.3  | I <sup>-</sup>                | ITC | 4.20 | 298 | -24.0 | 4.87  | 0.94 | 0.61 | 0.95 | 56.87 |
| 99               | <b>1b</b> | 1 | H <sub>2</sub> O/CH <sub>3</sub> CN | 70.0  | 87.1  | I <sup>-</sup>                | ITC | 4.23 | 298 | -24.1 | 3.04  | 1.02 | 0.62 | 1.04 | 59.07 |
| 100              | <b>1b</b> | 1 | H <sub>2</sub> O/CH <sub>3</sub> CN | 80.0  | 92.1  | I <sup>-</sup>                | ITC | 4.22 | 298 | -24.1 | 2.05  | 1.06 | 0.60 | 1.08 | 60.37 |
| 101              | <b>1b</b> | 1 | H <sub>2</sub> O/CH <sub>3</sub> CN | 95.0  | 98.2  | I <sup>-</sup>                | ITC | 3.94 | 298 | -22.5 | 0.47  | 1.14 | 0.52 | 1.10 | 62.41 |
| 102              | <b>1b</b> | 1 | H <sub>2</sub> O/–                  | 100.0 | 100.0 | I <sup>-</sup>                | ITC | 3.62 | 298 | -20.7 | 0.00  | 1.17 | 0.47 | 1.09 | 1.09  |
| 103              | <b>1b</b> | 1 | H <sub>2</sub> O/–                  | 100.0 | 100.0 | Br <sup>-</sup>               | ITC | 3.23 | 298 | -18.4 | 0.00  | 1.17 | 0.47 | 1.09 | 1.09  |
| 104              | <b>1b</b> | 1 | H <sub>2</sub> O/–                  | 100.0 | 100.0 | Cl <sup>-</sup>               | ITC | 2.15 | 298 | -12.3 | 0.00  | 1.17 | 0.47 | 1.09 | 1.09  |
| 105              | <b>1b</b> | 1 | H <sub>2</sub> O/–                  | 100.0 | 100.0 | SO <sub>4</sub> <sup>2-</sup> | ITC | 3.31 | 298 | -18.9 | 0.00  | 1.17 | 0.47 | 1.09 | 1.09  |
| 106              | <b>1b</b> | 1 | H <sub>2</sub> O/CH <sub>3</sub> OH | 70.0  | 84.0  | SO <sub>4</sub> <sup>2-</sup> | ITC | 4.82 | 298 | -27.5 | 5.27  | 1.07 | 0.63 | 1.08 | 60.03 |
| 107              | <b>1b</b> | 1 | H <sub>2</sub> O/CH <sub>3</sub> OH | 95.0  | 97.7  | SO <sub>4</sub> <sup>2-</sup> | ITC | 3.62 | 298 | -20.7 | 0.66  | 1.16 | 0.51 | 1.10 | 62.55 |
| 108              | <b>1b</b> | 1 | H <sub>2</sub> O/CH <sub>3</sub> OH | 95.0  | 97.7  | I <sup>-</sup>                | ITC | 3.73 | 298 | -21.3 | -0.11 | 1.16 | 0.51 | 1.10 | 62.55 |
| 109              | <b>1b</b> | 1 | H <sub>2</sub> O/CH <sub>3</sub> CN | 70.0  | 87.1  | SO <sub>4</sub> <sup>2-</sup> | ITC | 4.66 | 298 | -26.6 | n.a.  | 1.02 | 0.62 | 1.04 | 59.07 |
| 110              | <b>1b</b> | 1 | H <sub>2</sub> O/CH <sub>3</sub> CN | 95.0  | 98.2  | SO <sub>4</sub> <sup>2-</sup> | ITC | 3.98 | 298 | -22.7 | n.a.  | 1.14 | 0.52 | 1.10 | 62.41 |
| 111              | <b>1b</b> | 1 | H <sub>2</sub> O/CH <sub>3</sub> CN | 95.0  | 98.2  | I <sup>-</sup>                | ITC | 3.77 | 298 | -21.5 | 0.47  | 1.14 | 0.52 | 1.10 | 62.41 |
| 112 <sup>c</sup> | <b>1b</b> | 1 | H <sub>2</sub> O/DMSO               | 40.0  | 72.4  | SO <sub>4</sub> <sup>2-</sup> | ITC | 6.72 | 298 | -38.3 | 46.58 | 0.49 | 0.64 | 1.10 | 53.56 |

|                  |           |   |                                     |      |      |                               |     |      |     |       |      |       |      |      |      |       |
|------------------|-----------|---|-------------------------------------|------|------|-------------------------------|-----|------|-----|-------|------|-------|------|------|------|-------|
| 113 <sup>c</sup> | <b>1b</b> | 1 | H <sub>2</sub> O/DMSO               | 50.0 | 79.8 | SO <sub>4</sub> <sup>2-</sup> | ITC | 5.89 | 298 | -33.6 |      | 32.31 | 0.59 | 0.61 | 1.12 | 55.30 |
| 114 <sup>c</sup> | <b>1b</b> | 1 | H <sub>2</sub> O/DMSO               | 70.0 | 90.2 | SO <sub>4</sub> <sup>2-</sup> | ITC | 4.85 | 298 | -27.7 |      | 13.20 | 0.81 | 0.55 | 1.12 | 58.63 |
| 115 <sup>c</sup> | <b>1b</b> | 1 | H <sub>2</sub> O/DMSO               | 90.0 | 97.3 | SO <sub>4</sub> <sup>2-</sup> | ITC | 3.86 | 298 | -22.0 |      | 2.54  | 1.05 | 0.50 | 1.10 | 61.68 |
| 116 <sup>c</sup> | <b>1b</b> | 1 | H <sub>2</sub> O/DMSO               | 0.0  | 0.0  | I <sup>-</sup>                | ITC | 3.21 | 298 | -18.3 |      | 14.08 | 0.00 | 0.79 | 0.98 | 45.00 |
| 117 <sup>c</sup> | <b>1b</b> | 1 | H <sub>2</sub> O/DMSO               | 70.0 | 90.2 | I <sup>-</sup>                | ITC | 3.20 | 298 | -18.3 |      | 1.33  | 0.81 | 0.55 | 1.12 | 58.63 |
| 118              | <b>1e</b> | 1 | H <sub>2</sub> O/CH <sub>3</sub> CN | 33.0 | 58.8 | I <sup>-</sup>                | ITC | 4.45 | 298 | -25.4 |      | 6.57  | 0.88 | 0.60 | 0.86 | 55.79 |
| 119              | <b>1e</b> | 1 | H <sub>2</sub> O/CH <sub>3</sub> CN | 33.0 | 58.8 | SO <sub>4</sub> <sup>2-</sup> | ITC | 6.71 | 298 | -38.3 | [10] | n.a.  | 0.88 | 0.60 | 0.86 | 55.79 |
| 120              | <b>3e</b> | 3 | D <sub>2</sub> O/CD <sub>3</sub> CN | 33.0 | 61.3 | I <sup>-</sup>                | NMR | 3.00 | 298 | -17.1 |      | 6.30  | 0.89 | 0.60 | 0.87 | 55.88 |
| 121              | <b>3e</b> | 3 | H <sub>2</sub> O/CH <sub>3</sub> CN | 33.0 | 58.8 | SO <sub>4</sub> <sup>2-</sup> | ITC | 4.31 | 298 | -24.6 |      | n.a.  | 0.88 | 0.60 | 0.86 | 55.79 |

<sup>a</sup> Gibbs free energies in kJ mol<sup>-1</sup>; <sup>b</sup> n.a. – not available; <sup>c</sup> not considered in the statistical analysis.

**Tables S2.** Polynomial Fits of Transfer Energies and Solvent Property Parameters $\Delta G^\circ_{\text{tr}}$  of the Transfer of Chloride Anions from Water to Water/Methanol Mixtures<sup>11</sup>

| mol% Water (x) | $\Delta G^\circ_{\text{tr}} / \text{kJ mol}^{-1}$ (y) |
|----------------|-------------------------------------------------------|
| 0.0            | 13.2                                                  |
| 10.0           | 11.7                                                  |
| 20.0           | 10.2                                                  |
| 30.0           | 8.6                                                   |
| 40.0           | 7.0                                                   |
| 50.0           | 5.5                                                   |
| 60.0           | 4.1                                                   |
| 70.0           | 2.8                                                   |
| 80.0           | 1.6                                                   |
| 90.0           | 0.6                                                   |
| 100.0          | 0.0                                                   |

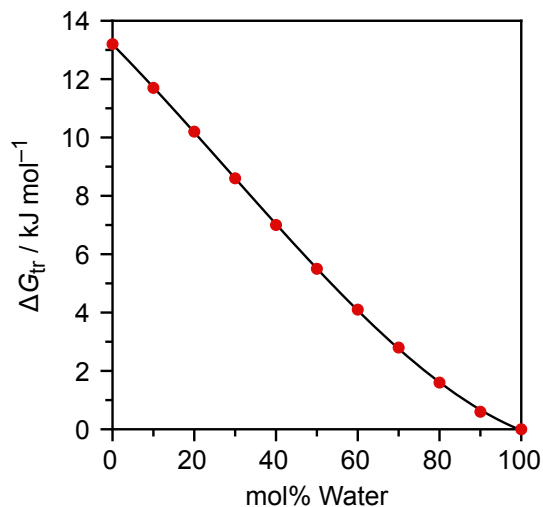

| Polynomial |   | $y = a \times x^7 + b \times x^6 + c \times x^5 + d \times x^4 + e \times x^3 + f \times x^2 + g \times x + h$ |   |          |           |           |          |  |
|------------|---|----------------------------------------------------------------------------------------------------------------|---|----------|-----------|-----------|----------|--|
| a          | b | c                                                                                                              | d | e        | f         | g         | h        |  |
| 0          | 0 | 0                                                                                                              | 0 | 6.57E-06 | -5.57E-04 | -1.42E-01 | 1.32E+01 |  |

 $\Delta G^\circ_{\text{tr}}$  of the Transfer of Bromide Anions from Water to Water/Methanol Mixtures<sup>11</sup>

| mol% Water (x) | $\Delta G^\circ_{\text{tr}} / \text{kJ mol}^{-1}$ (y) |
|----------------|-------------------------------------------------------|
| 0.0            | 11.1                                                  |
| 10.0           | 9.8                                                   |
| 20.0           | 8.4                                                   |
| 30.0           | 6.9                                                   |
| 40.0           | 5.4                                                   |
| 50.0           | 4.1                                                   |
| 60.0           | 2.8                                                   |
| 70.0           | 1.7                                                   |
| 80.0           | 0.8                                                   |
| 90.0           | 0.1                                                   |
| 100.0          | 0.0                                                   |

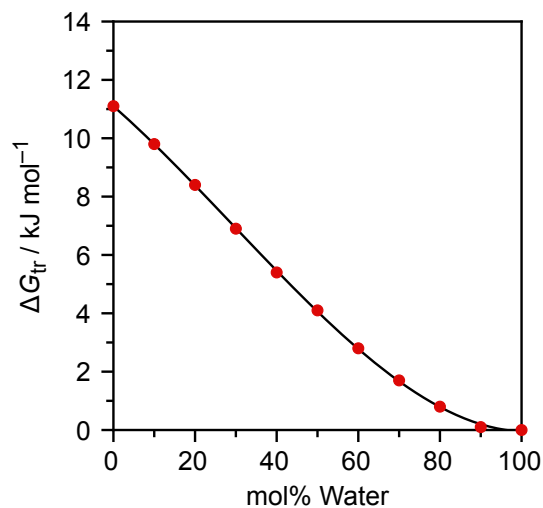

| Polynomial |   | $y = a \times x^7 + b \times x^6 + c \times x^5 + d \times x^4 + e \times x^3 + f \times x^2 + g \times x + h$ |   |          |           |           |          |  |
|------------|---|----------------------------------------------------------------------------------------------------------------|---|----------|-----------|-----------|----------|--|
| a          | b | c                                                                                                              | d | e        | f         | g         | h        |  |
| 0          | 0 | 0                                                                                                              | 0 | 9.40E-06 | -8.24E-04 | -1.23E-01 | 1.11E+01 |  |

$\Delta G^\circ_{\text{tr}}$  of the Transfer of Iodide Anions from Water to Water/Methanol Mixtures<sup>11</sup>

| mol% Water (x) | $\Delta G^\circ_{\text{tr}} / \text{kJ mol}^{-1}$ (y) |
|----------------|-------------------------------------------------------|
| 0.0            | 7.3                                                   |
| 10.0           | 6.1                                                   |
| 20.0           | 4.9                                                   |
| 30.0           | 3.7                                                   |
| 40.0           | 2.6                                                   |
| 50.0           | 1.7                                                   |
| 60.0           | 0.9                                                   |
| 70.0           | 0.3                                                   |
| 80.0           | -0.1                                                  |
| 90.0           | -0.3                                                  |
| 100.0          | 0.0                                                   |

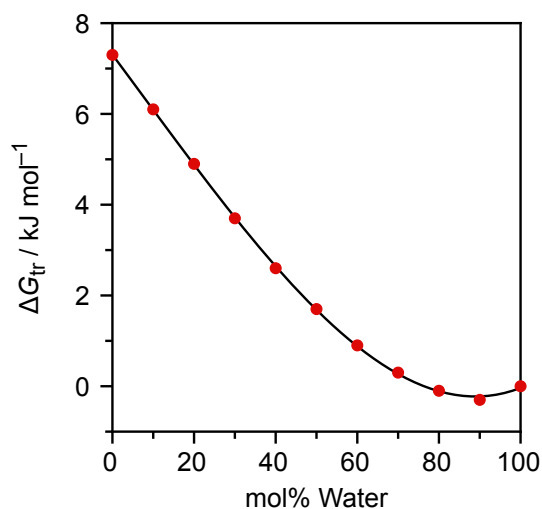

| Polynomial |   | $y = a \times x^7 + b \times x^6 + c \times x^5 + d \times x^4 + e \times x^3 + f \times x^2 + g \times x + h$ |   |          |           |           |          |
|------------|---|----------------------------------------------------------------------------------------------------------------|---|----------|-----------|-----------|----------|
| a          | b | c                                                                                                              | d | e        | f         | g         | h        |
| 0          | 0 | 0                                                                                                              | 0 | 6.10E-06 | -1.34E-04 | -1.21E-01 | 7.31E+00 |

$\Delta G^\circ_{\text{tr}}$  of the Transfer of Sulfate Anions from Water to Water/Methanol Mixtures<sup>11</sup>

| mol% Water (x) | $\Delta G^\circ_{\text{tr}} / \text{kJ mol}^{-1}$ (y) |
|----------------|-------------------------------------------------------|
| 0.0            |                                                       |
| 10.0           |                                                       |
| 20.0           |                                                       |
| 30.0           |                                                       |
| 40.0           |                                                       |
| 50.0           |                                                       |
| 60.0           | 16.0                                                  |
| 70.0           | 11.7                                                  |
| 80.0           | 6.3                                                   |
| 90.0           | 3.3                                                   |
| 100.0          | 0.0                                                   |

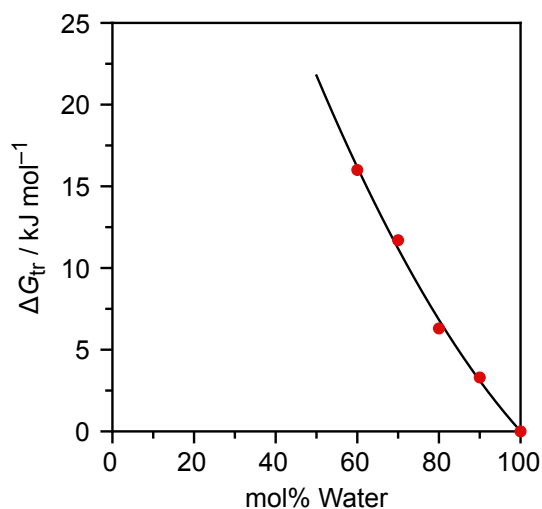

| Polynomial |   | $y = a \times x^7 + b \times x^6 + c \times x^5 + d \times x^4 + e \times x^3 + f \times x^2 + g \times x + h$ |   |   |          |           |          |
|------------|---|----------------------------------------------------------------------------------------------------------------|---|---|----------|-----------|----------|
| a          | b | c                                                                                                              | d | e | f        | g         | h        |
| 0          | 0 | 0                                                                                                              | 0 | 0 | 3.14E-03 | -9.07E-01 | 5.93E+01 |

$\Delta G^\circ_{\text{tr}}$  of the Transfer of Nitrate Anions from Water to Water/Methanol Mixtures<sup>11</sup>

| mol% Water (x) | $\Delta G^\circ_{\text{tr}} / \text{kJ mol}^{-1}$ (y) |
|----------------|-------------------------------------------------------|
| 0.0            |                                                       |
| 10.0           |                                                       |
| 20.0           |                                                       |
| 30.0           |                                                       |
| 40.0           |                                                       |
| 50.0           |                                                       |
| 60.0           | 2.4                                                   |
| 70.0           | 1.5                                                   |
| 80.0           | 0.6                                                   |
| 90.0           | 0.0                                                   |
| 100.0          | 0.0                                                   |

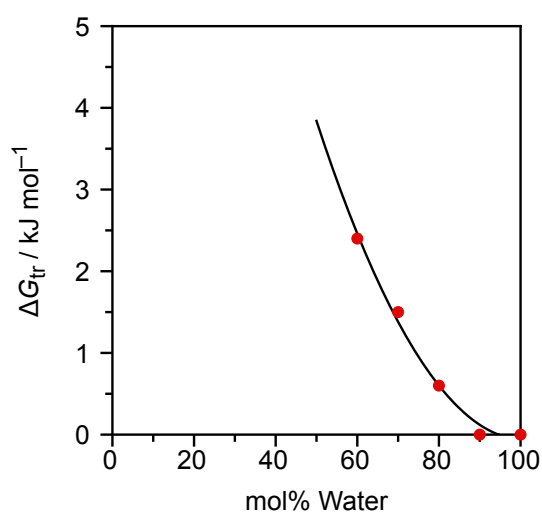

| Polynomial |   | $y = a \times x^7 + b \times x^6 + c \times x^5 + d \times x^4 + e \times x^3 + f \times x^2 + g \times x + h$ |   |   |          |           |          |  |
|------------|---|----------------------------------------------------------------------------------------------------------------|---|---|----------|-----------|----------|--|
| a          | b | c                                                                                                              | d | e | f        | g         | h        |  |
| 0          | 0 | 0                                                                                                              | 0 | 0 | 1.50E-03 | -3.03E-01 | 1.52E+01 |  |

$\Delta G^\circ_{\text{tr}}$  of the Transfer of Chloride Anions from Water to Water/Acetonitrile Mixtures<sup>11</sup>

| mol% Water (x) | $\Delta G^\circ_{\text{tr}} / \text{kJ mol}^{-1}$ (y) |
|----------------|-------------------------------------------------------|
| 0.0            | 42.1                                                  |
| 10.0           | 37.1                                                  |
| 20.0           | 32.3                                                  |
| 30.0           |                                                       |
| 40.0           | 17.5                                                  |
| 50.0           | 12.7                                                  |
| 60.0           | 10.3                                                  |
| 70.0           | 8.5                                                   |
| 80.0           | 6.0                                                   |
| 90.0           | 4.0                                                   |
| 100.0          | 0.0                                                   |

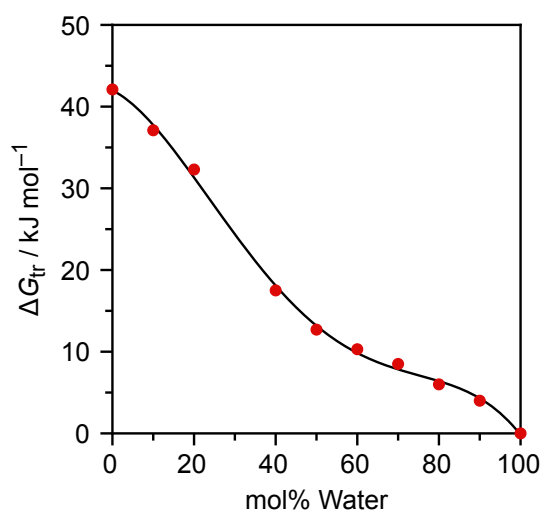

| Polynomial |   | $y = a \times x^7 + b \times x^6 + c \times x^5 + d \times x^4 + e \times x^3 + f \times x^2 + g \times x + h$ |           |          |           |           |          |  |
|------------|---|----------------------------------------------------------------------------------------------------------------|-----------|----------|-----------|-----------|----------|--|
| a          | b | c                                                                                                              | d         | e        | f         | g         | h        |  |
| 0          | 0 | 0                                                                                                              | -2.02E-06 | 4.00E-04 | -2.16E-02 | -2.46E-01 | 4.20E+01 |  |

$\Delta G^\circ_{\text{tr}}$  of the Transfer of Bromide Anions from Water to Water/Acetonitrile Mixtures<sup>11</sup>

| mol% Water (x) | $\Delta G^\circ_{\text{tr}} / \text{kJ mol}^{-1}$ (y) |
|----------------|-------------------------------------------------------|
| 0.0            | 33.0                                                  |
| 10.0           | 28.9                                                  |
| 20.0           | 25.0                                                  |
| 30.0           | 19.4                                                  |
| 40.0           | 15.2                                                  |
| 50.0           | 12.0                                                  |
| 60.0           | 9.6                                                   |
| 70.0           | 7.7                                                   |
| 80.0           | 5.9                                                   |
| 90.0           | 3.4                                                   |
| 100.0          | 0.0                                                   |

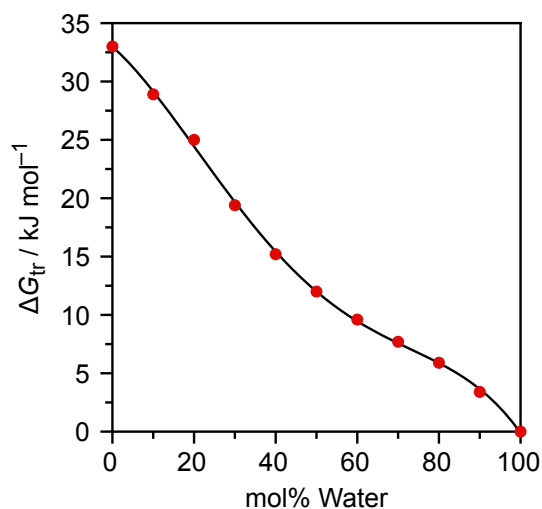

| Polynomial |   | $y = a \times x^7 + b \times x^6 + c \times x^5 + d \times x^4 + e \times x^3 + f \times x^2 + g \times x + h$ |           |          |           |           |          |  |
|------------|---|----------------------------------------------------------------------------------------------------------------|-----------|----------|-----------|-----------|----------|--|
| a          | b | c                                                                                                              | d         | e        | f         | g         | h        |  |
| 0          | 0 | 0                                                                                                              | -1.08E-06 | 2.03E-04 | -9.72E-03 | -3.05E-01 | 3.30E+01 |  |

$\Delta G^\circ_{\text{tr}}$  of the Transfer of Iodide Anions from Water to Water/Acetonitrile Mixtures<sup>11</sup>

| mol% Water (x) | $\Delta G^\circ_{\text{tr}} / \text{kJ mol}^{-1}$ (y) |
|----------------|-------------------------------------------------------|
| 0.0            | 20.3                                                  |
| 10.0           | 16.9                                                  |
| 20.0           | 14.0                                                  |
| 30.0           | 11.1                                                  |
| 40.0           | 9.2                                                   |
| 50.0           | 7.7                                                   |
| 60.0           | 6.4                                                   |
| 70.0           | 5.5                                                   |
| 80.0           | 4.2                                                   |
| 90.0           | 2.3                                                   |
| 100.0          | 0.0                                                   |

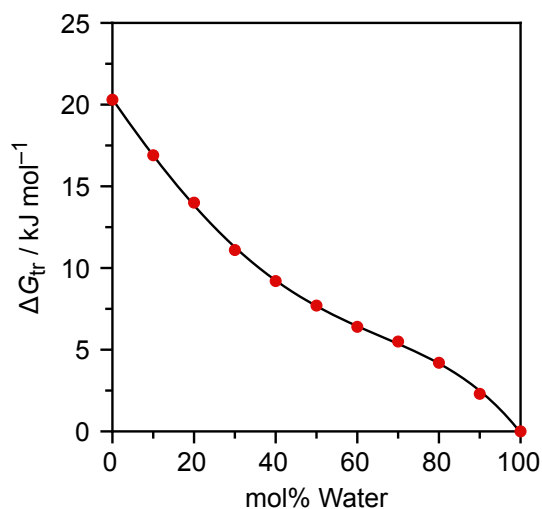

| Polynomial |   | $y = a \times x^7 + b \times x^6 + c \times x^5 + d \times x^4 + e \times x^3 + f \times x^2 + g \times x + h$ |           |          |          |           |          |  |
|------------|---|----------------------------------------------------------------------------------------------------------------|-----------|----------|----------|-----------|----------|--|
| a          | b | c                                                                                                              | d         | e        | f        | g         | h        |  |
| 0          | 0 | 0                                                                                                              | -3.09E-07 | 3.50E-05 | 1.14E-03 | -3.59E-01 | 2.03E+01 |  |

# Kamlet-Taft Parameter $\alpha$ for Water/Methanol Mixtures<sup>12</sup>

| mol% Water (x) | $\alpha$ (y) |
|----------------|--------------|
| 0.0            | 1.00         |
| 10.0           | 1.01         |
| 20.0           | 1.01         |
| 30.0           | 1.00         |
| 40.0           | 0.99         |
| 50.0           | 0.98         |
| 60.0           | 0.98         |
| 70.0           | 1.01         |
| 80.0           | 1.04         |
| 90.0           | 1.11         |
| 100.0          | 1.17         |

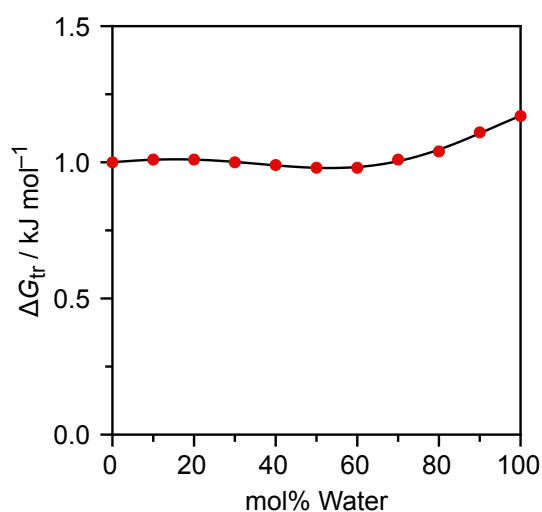

| Polynomial |   | $y = a \times x^7 + b \times x^6 + c \times x^5 + d \times x^4 + e \times x^3 + f \times x^2 + g \times x + h$ |          |           |           |          |          |  |
|------------|---|----------------------------------------------------------------------------------------------------------------|----------|-----------|-----------|----------|----------|--|
| a          | b | c                                                                                                              | d        | e         | f         | g        | h        |  |
| 0          | 0 | -1.92E-10                                                                                                      | 4.08E-08 | -2.01E-06 | -8.97E-06 | 1.18E-03 | 1.00E+00 |  |

# Kamlet-Taft Parameter $\beta$ for Water/Methanol Mixtures<sup>12</sup>

| mol% Water (x) | $\beta$ (y) |
|----------------|-------------|
| 0.0            | 0.70        |
| 10.0           | 0.70        |
| 20.0           | 0.68        |
| 30.0           | 0.67        |
| 40.0           | 0.67        |
| 50.0           | 0.68        |
| 60.0           | 0.69        |
| 70.0           | 0.68        |
| 80.0           | 0.65        |
| 90.0           | 0.59        |
| 100.0          | 0.47        |

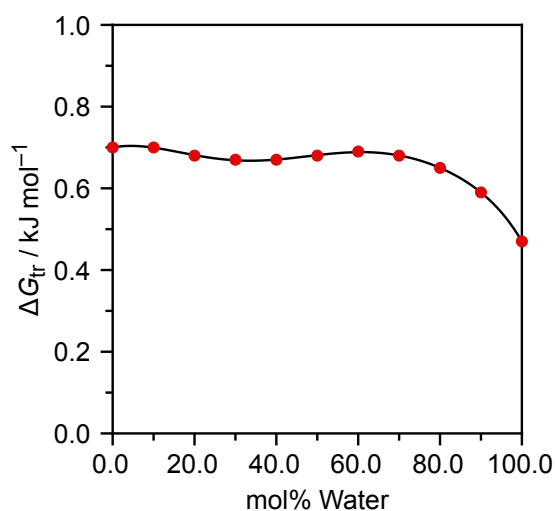

| Polynomial |          | $y = a \times x^7 + b \times x^6 + c \times x^5 + d \times x^4 + e \times x^3 + f \times x^2 + g \times x + h$ |          |          |           |          |          |  |
|------------|----------|----------------------------------------------------------------------------------------------------------------|----------|----------|-----------|----------|----------|--|
| a          | b        | c                                                                                                              | d        | e        | f         | g        | h        |  |
| -1.11E-13  | 3.29E-11 | -3.39E-09                                                                                                      | 1.04E-07 | 3.49E-06 | -2.25E-04 | 1.77E-03 | 7.00E-01 |  |

# Kamlet-Taft Parameter $\pi^*$ for Water/Methanol Mixtures<sup>12</sup>

| mol% Water (x) | $\pi^*$ (y) |
|----------------|-------------|
| 0.0            | 0.59        |
| 10.0           | 0.67        |
| 20.0           | 0.73        |
| 30.0           | 0.79        |
| 40.0           | 0.85        |
| 50.0           | 0.91        |
| 60.0           | 0.96        |
| 70.0           | 1.02        |
| 80.0           | 1.07        |
| 90.0           | 1.10        |
| 100.0          | 1.09        |

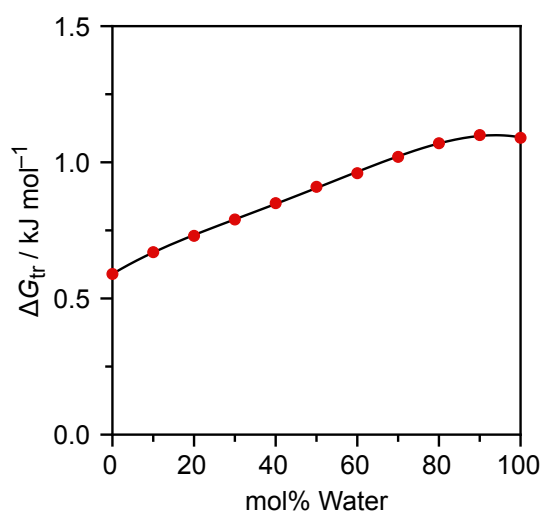

| Polynomial |   | $y = a \times x^7 + b \times x^6 + c \times x^5 + d \times x^4 + e \times x^3 + f \times x^2 + g \times x + h$ |           |          |           |          |          |  |
|------------|---|----------------------------------------------------------------------------------------------------------------|-----------|----------|-----------|----------|----------|--|
| a          | b | c                                                                                                              | d         | e        | f         | g        | h        |  |
| 0          | 0 | 0                                                                                                              | -1.31E-08 | 2.26E-06 | -1.35E-04 | 9.06E-03 | 5.90E-01 |  |

# Reichardt's $E_T(30)$ for Water/Methanol Mixtures<sup>12</sup>

| mol% Water (x) | $E_T(30)$ (y) |
|----------------|---------------|
| 0.0            | 55.70         |
| 10.0           | 55.80         |
| 20.0           | 56.10         |
| 30.0           | 56.50         |
| 40.0           | 56.80         |
| 50.0           | 57.30         |
| 60.0           | 57.80         |
| 70.0           | 58.50         |
| 80.0           | 59.50         |
| 90.0           | 61.00         |
| 100.0          | 63.10         |

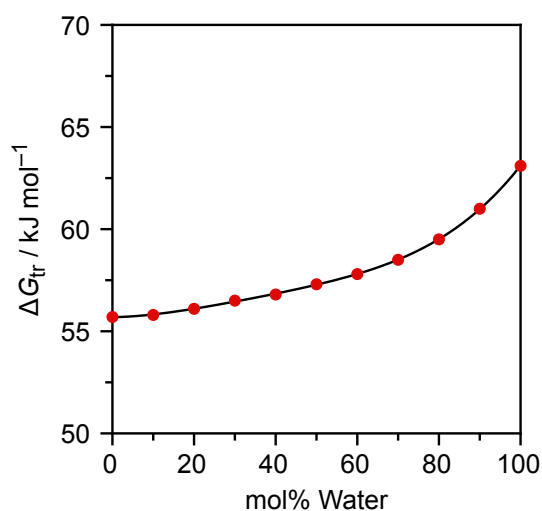

| Polynomial |   | $y = a \times x^7 + b \times x^6 + c \times x^5 + d \times x^4 + e \times x^3 + f \times x^2 + g \times x + h$ |          |           |          |          |          |  |
|------------|---|----------------------------------------------------------------------------------------------------------------|----------|-----------|----------|----------|----------|--|
| a          | b | c                                                                                                              | d        | e         | f        | g        | h        |  |
| 0          | 0 | 0                                                                                                              | 1.69E-07 | -2.18E-05 | 1.26E-03 | 2.94E-03 | 5.57E+01 |  |

# Kamlet-Taft Parameter $\alpha$ for Water/Acetonitrile Mixtures<sup>12</sup>

| mol% Water (x) | $\alpha$ (y) |
|----------------|--------------|
| 0.0            | 0.25         |
| 10.0           | 0.55         |
| 20.0           | 0.70         |
| 30.0           | 0.78         |
| 40.0           | 0.83         |
| 50.0           | 0.86         |
| 60.0           | 0.89         |
| 70.0           | 0.92         |
| 80.0           | 0.96         |
| 90.0           | 1.05         |
| 100.0          | 1.17         |

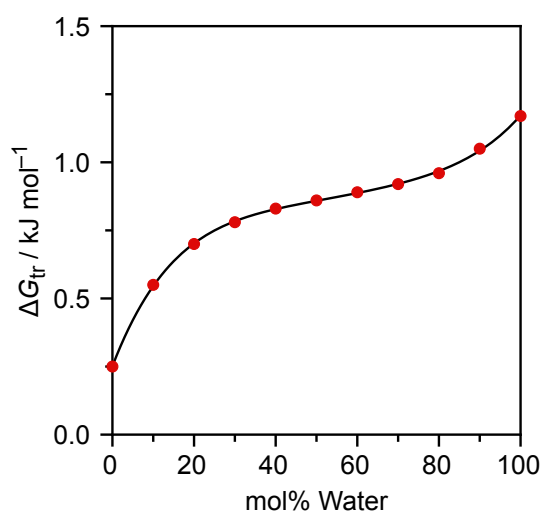

| Polynomial |   | $y = a \times x^7 + b \times x^6 + c \times x^5 + d \times x^4 + e \times x^3 + f \times x^2 + g \times x + h$ |           |          |           |          |          |  |
|------------|---|----------------------------------------------------------------------------------------------------------------|-----------|----------|-----------|----------|----------|--|
| a          | b | c                                                                                                              | d         | e        | f         | g        | h        |  |
| 0          | 0 | 4.81E-10                                                                                                       | -1.41E-07 | 1.75E-05 | -1.12E-03 | 3.90E-02 | 2.51E-01 |  |

# Kamlet-Taft Parameter $\beta$ for Water/Acetonitrile Mixtures<sup>12</sup>

| mol% Water (x) | $\beta$ (y) |
|----------------|-------------|
| 0.0            | 0.47        |
| 10.0           | 0.53        |
| 20.0           | 0.57        |
| 30.0           | 0.59        |
| 40.0           | 0.59        |
| 50.0           | 0.59        |
| 60.0           | 0.60        |
| 70.0           | 0.61        |
| 80.0           | 0.61        |
| 90.0           | 0.61        |
| 100.0          | 0.47        |

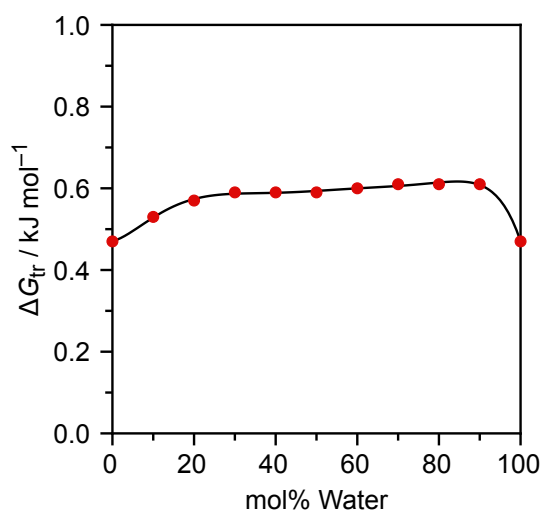

| Polynomial |          | $y = a \times x^7 + b \times x^6 + c \times x^5 + d \times x^4 + e \times x^3 + f \times x^2 + g \times x + h$ |          |           |          |          |          |  |
|------------|----------|----------------------------------------------------------------------------------------------------------------|----------|-----------|----------|----------|----------|--|
| a          | b        | c                                                                                                              | d        | e         | f        | g        | h        |  |
| -4.90E-13  | 1.63E-10 | -2.16E-08                                                                                                      | 1.45E-06 | -4.90E-05 | 6.72E-04 | 2.75E-03 | 4.70E-01 |  |

Kamlet-Taft Parameter  $\pi^*$  for Water/Methanol Mixtures<sup>12</sup>

| mol% Water (x) | $\pi^*$ (y) |
|----------------|-------------|
| 0.0            | 0.73        |
| 10.0           | 0.75        |
| 20.0           | 0.77        |
| 30.0           | 0.80        |
| 40.0           | 0.82        |
| 50.0           | 0.85        |
| 60.0           | 0.87        |
| 70.0           | 0.92        |
| 80.0           | 0.97        |
| 90.0           | 1.08        |
| 100.0          | 1.09        |

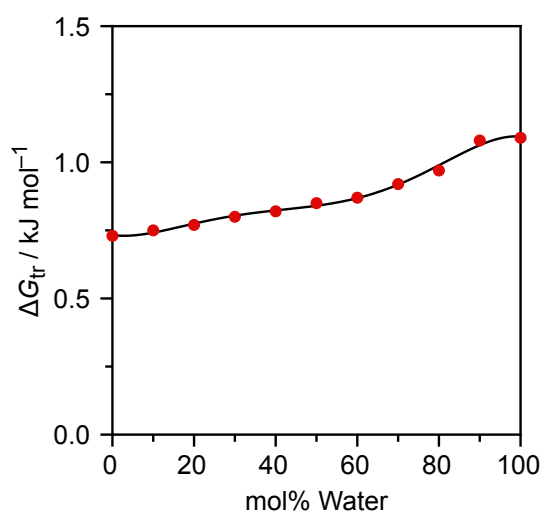

| Polynomial |   | $y = a \times x^7 + b \times x^6 + c \times x^5 + d \times x^4 + e \times x^3 + f \times x^2 + g \times x + h$ |          |           |          |           |          |  |
|------------|---|----------------------------------------------------------------------------------------------------------------|----------|-----------|----------|-----------|----------|--|
| a          | b | c                                                                                                              | d        | e         | f        | g         | h        |  |
| 0          | 0 | -6.73E-10                                                                                                      | 1.58E-07 | -1.24E-05 | 3.92E-04 | -1.92E-03 | 7.33E-01 |  |

Reichardt's  $E_T(30)$  for Water/Methanol Mixtures<sup>12</sup>

| mol% Water (x) | $E_T(30)$ (y) |
|----------------|---------------|
| 0.0            | 46.00         |
| 10.0           | 50.80         |
| 20.0           | 53.60         |
| 30.0           | 54.90         |
| 40.0           | 55.40         |
| 50.0           | 55.60         |
| 60.0           | 55.80         |
| 70.0           | 56.50         |
| 80.0           | 57.60         |
| 90.0           | 59.80         |
| 100.0          | 63.10         |

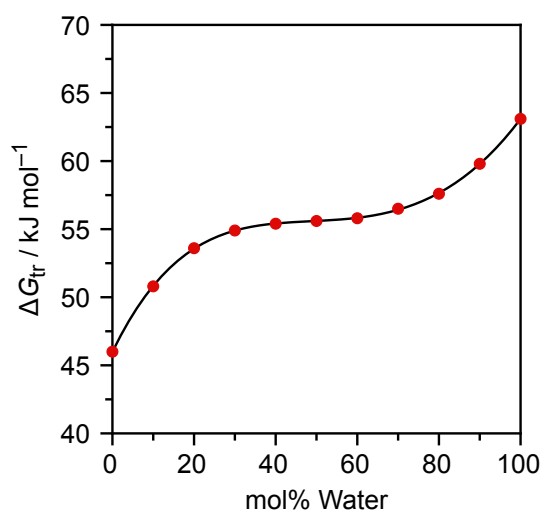

| Polynomial |   | $y = a \times x^7 + b \times x^6 + c \times x^5 + d \times x^4 + e \times x^3 + f \times x^2 + g \times x + h$ |           |          |           |          |          |  |
|------------|---|----------------------------------------------------------------------------------------------------------------|-----------|----------|-----------|----------|----------|--|
| a          | b | c                                                                                                              | d         | e        | f         | g        | h        |  |
| 0          | 0 | 2.08E-09                                                                                                       | -7.89E-07 | 1.63E-04 | -1.50E-02 | 6.19E-01 | 4.60E+01 |  |

**Tables S3.** Comparison of the Experimental and Calculated Gibbs free EnergiesIodide Complexation /  $E_T(30)$ 

| Linear Relationship |                               |                                 | $\Delta G^\circ_{\text{calcd}} = g \Delta G^\circ_{\text{tr}} + e E_T(30) + a \alpha + b \beta + p \pi^*$ <sup>a</sup> |     |     |        |
|---------------------|-------------------------------|---------------------------------|------------------------------------------------------------------------------------------------------------------------|-----|-----|--------|
| $g$                 | $e$                           |                                 | $a$                                                                                                                    | $b$ | $p$ | $R^2$  |
| -0.74               | -0.40                         |                                 |                                                                                                                        |     |     | 0.9424 |
| Entry               | $\Delta G^\circ_{\text{exp}}$ | $\Delta G^\circ_{\text{calcd}}$ |                                                                                                                        |     |     |        |
| 37                  | -25.3                         | -23.75                          |                                                                                                                        |     |     |        |
| 41                  | -23.1                         | -27.30                          |                                                                                                                        |     |     |        |
| 64                  | -28.3                         | -25.07                          |                                                                                                                        |     |     |        |
| 65                  | -27.0                         | -24.33                          |                                                                                                                        |     |     |        |
| 66                  | -26.2                         | -23.75                          |                                                                                                                        |     |     |        |
| 67                  | -25.3                         | -24.01                          |                                                                                                                        |     |     |        |
| 68                  | -23.5                         | -24.83                          |                                                                                                                        |     |     |        |
| 69                  | -22.6                         | -25.09                          |                                                                                                                        |     |     |        |
| 77                  | -33.4                         | -26.91                          |                                                                                                                        |     |     |        |
| 78                  | -30.8                         | -26.18                          |                                                                                                                        |     |     |        |
| 79                  | -31.5                         | -26.18                          |                                                                                                                        |     |     |        |
| 80                  | -28.3                         | -25.07                          |                                                                                                                        |     |     |        |
| 81                  | -26.9                         | -24.33                          |                                                                                                                        |     |     |        |
| 82                  | -26.2                         | -23.75                          |                                                                                                                        |     |     |        |
| 83                  | -25.3                         | -24.01                          |                                                                                                                        |     |     |        |
| 84                  | -23.4                         | -24.83                          |                                                                                                                        |     |     |        |
| 85                  | -22.6                         | -25.09                          |                                                                                                                        |     |     |        |
| 86                  | -21.7                         | -0.44                           |                                                                                                                        |     |     |        |
| 94                  | -31.7                         | -32.58                          |                                                                                                                        |     |     |        |
| 95                  | -27.0                         | -28.88                          |                                                                                                                        |     |     |        |
| 96                  | -26.9                         | -28.88                          |                                                                                                                        |     |     |        |
| 97                  | -24.8                         | -27.56                          |                                                                                                                        |     |     |        |
| 98                  | -24.0                         | -26.48                          |                                                                                                                        |     |     |        |
| 99                  | -24.1                         | -26.01                          |                                                                                                                        |     |     |        |
| 100                 | -24.1                         | -25.80                          |                                                                                                                        |     |     |        |
| 101                 | -22.5                         | -25.46                          |                                                                                                                        |     |     |        |
| 102                 | -20.7                         | -0.44                           |                                                                                                                        |     |     |        |
| 108                 | -21.3                         | -25.09                          |                                                                                                                        |     |     |        |
| 111                 | -21.5                         | -25.46                          |                                                                                                                        |     |     |        |

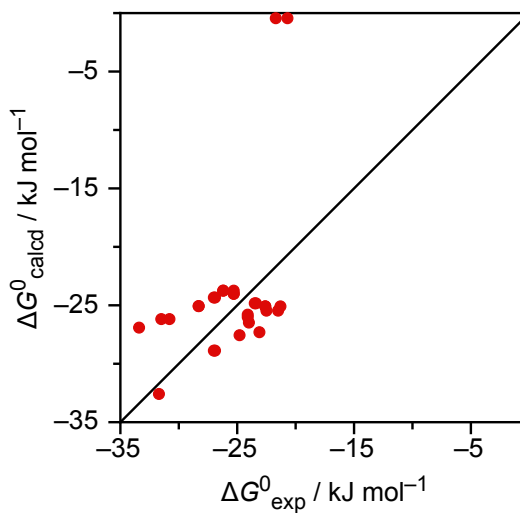<sup>a</sup>  $e$ ,  $a$ ,  $b$ , and  $p$  in  $\text{kJ mol}^{-1}$ .

| Linear Relationship |                               |                                 | $\Delta G^\circ_{\text{calcd}} = g \Delta G^\circ_{\text{tr}} + e E_{\text{T}}(30) + a \alpha + b \beta + p \pi^*$ <sup>a</sup> |        |      |        |
|---------------------|-------------------------------|---------------------------------|---------------------------------------------------------------------------------------------------------------------------------|--------|------|--------|
|                     | $g$                           | $e$                             | $a$                                                                                                                             | $b$    | $p$  | $R^2$  |
|                     | -0.65                         |                                 | -14.44                                                                                                                          | -27.77 | 8.03 | 0.9976 |
| Entry               | $\Delta G^\circ_{\text{exp}}$ | $\Delta G^\circ_{\text{calcd}}$ |                                                                                                                                 |        |      |        |
| 37                  | -25.3                         | -25.43                          |                                                                                                                                 |        |      |        |
| 41                  | -23.1                         | -26.72                          |                                                                                                                                 |        |      |        |
| 64                  | -28.3                         | -28.27                          |                                                                                                                                 |        |      |        |
| 65                  | -27.0                         | -26.96                          |                                                                                                                                 |        |      |        |
| 66                  | -26.2                         | -25.43                          |                                                                                                                                 |        |      |        |
| 67                  | -25.3                         | -24.12                          |                                                                                                                                 |        |      |        |
| 68                  | -23.5                         | -22.48                          |                                                                                                                                 |        |      |        |
| 69                  | -22.6                         | -21.89                          |                                                                                                                                 |        |      |        |
| 77                  | -33.4                         | -32.48                          |                                                                                                                                 |        |      |        |
| 78                  | -30.8                         | -30.78                          |                                                                                                                                 |        |      |        |
| 79                  | -31.5                         | -30.78                          |                                                                                                                                 |        |      |        |
| 80                  | -28.3                         | -28.27                          |                                                                                                                                 |        |      |        |
| 81                  | -26.9                         | -26.96                          |                                                                                                                                 |        |      |        |
| 82                  | -26.2                         | -25.43                          |                                                                                                                                 |        |      |        |
| 83                  | -25.3                         | -24.12                          |                                                                                                                                 |        |      |        |
| 84                  | -23.4                         | -22.48                          |                                                                                                                                 |        |      |        |
| 85                  | -22.6                         | -21.89                          |                                                                                                                                 |        |      |        |
| 86                  | -21.7                         | -21.19                          |                                                                                                                                 |        |      |        |
| 94                  | -31.7                         | -28.21                          |                                                                                                                                 |        |      |        |
| 95                  | -27.0                         | -27.55                          |                                                                                                                                 |        |      |        |
| 96                  | -26.9                         | -27.55                          |                                                                                                                                 |        |      |        |
| 97                  | -24.8                         | -26.86                          |                                                                                                                                 |        |      |        |
| 98                  | -24.0                         | -26.04                          |                                                                                                                                 |        |      |        |
| 99                  | -24.1                         | -25.38                          |                                                                                                                                 |        |      |        |
| 100                 | -24.1                         | -24.68                          |                                                                                                                                 |        |      |        |
| 101                 | -22.5                         | -22.40                          |                                                                                                                                 |        |      |        |
| 102                 | -20.7                         | -21.19                          |                                                                                                                                 |        |      |        |
| 108                 | -21.3                         | -21.89                          |                                                                                                                                 |        |      |        |
| 111                 | -21.5                         | -22.40                          |                                                                                                                                 |        |      |        |

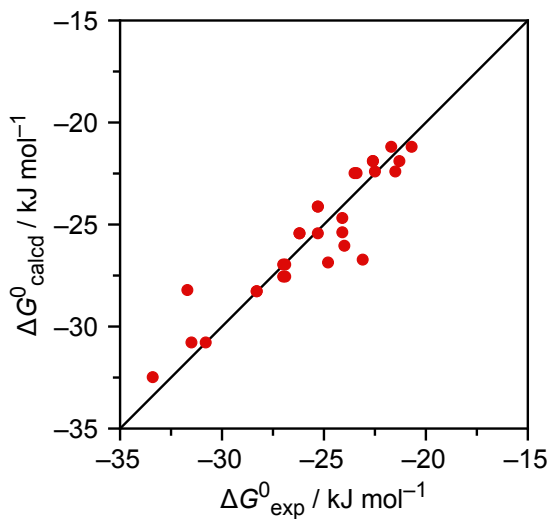

<sup>a</sup>  $e$ ,  $a$ ,  $b$ , and  $p$  in  $\text{kJ mol}^{-1}$ .

| Linear Relationship |                               |                                 | $\Delta G^\circ_{\text{calcd}} = g \Delta G^\circ_{\text{tr}} + e E_{\text{T}}(30) + a \alpha + b \beta + p \pi^*$ <sup>a</sup> |        |     |
|---------------------|-------------------------------|---------------------------------|---------------------------------------------------------------------------------------------------------------------------------|--------|-----|
| $g$                 | $e$                           |                                 | $a$                                                                                                                             | $b$    | $p$ |
| -0.62               |                               |                                 | -6.24                                                                                                                           | -29.00 |     |
| Entry               | $\Delta G^\circ_{\text{exp}}$ | $\Delta G^\circ_{\text{calcd}}$ | $R^2$                                                                                                                           |        |     |
| 37                  | -25.3                         | -26.23                          | 0.9967                                                                                                                          |        |     |
| 41                  | -23.1                         | -26.97                          |                                                                                                                                 |        |     |
| 64                  | -28.3                         | -27.48                          |                                                                                                                                 |        |     |
| 65                  | -27.0                         | -26.94                          |                                                                                                                                 |        |     |
| 66                  | -26.2                         | -26.23                          |                                                                                                                                 |        |     |
| 67                  | -25.3                         | -24.85                          |                                                                                                                                 |        |     |
| 68                  | -23.5                         | -22.63                          |                                                                                                                                 |        |     |
| 69                  | -22.6                         | -21.85                          |                                                                                                                                 |        |     |
| 77                  | -33.4                         | -30.30                          |                                                                                                                                 |        |     |
| 78                  | -30.8                         | -29.09                          |                                                                                                                                 |        |     |
| 79                  | -31.5                         | -29.09                          |                                                                                                                                 |        |     |
| 80                  | -28.3                         | -27.48                          |                                                                                                                                 |        |     |
| 81                  | -26.9                         | -26.94                          |                                                                                                                                 |        |     |
| 82                  | -26.2                         | -26.23                          |                                                                                                                                 |        |     |
| 83                  | -25.3                         | -24.85                          |                                                                                                                                 |        |     |
| 84                  | -23.4                         | -22.63                          |                                                                                                                                 |        |     |
| 85                  | -22.6                         | -21.85                          |                                                                                                                                 |        |     |
| 86                  | -21.7                         | -20.94                          |                                                                                                                                 |        |     |
| 94                  | -31.7                         | -29.48                          |                                                                                                                                 |        |     |
| 95                  | -27.0                         | -27.82                          |                                                                                                                                 |        |     |
| 96                  | -26.9                         | -27.82                          |                                                                                                                                 |        |     |
| 97                  | -24.8                         | -27.09                          |                                                                                                                                 |        |     |
| 98                  | -24.0                         | -26.56                          |                                                                                                                                 |        |     |
| 99                  | -24.1                         | -26.10                          |                                                                                                                                 |        |     |
| 100                 | -24.1                         | -25.29                          |                                                                                                                                 |        |     |
| 101                 | -22.5                         | -22.46                          |                                                                                                                                 |        |     |
| 102                 | -20.7                         | -20.94                          |                                                                                                                                 |        |     |
| 108                 | -21.3                         | -21.85                          |                                                                                                                                 |        |     |
| 111                 | -21.5                         | -22.46                          |                                                                                                                                 |        |     |

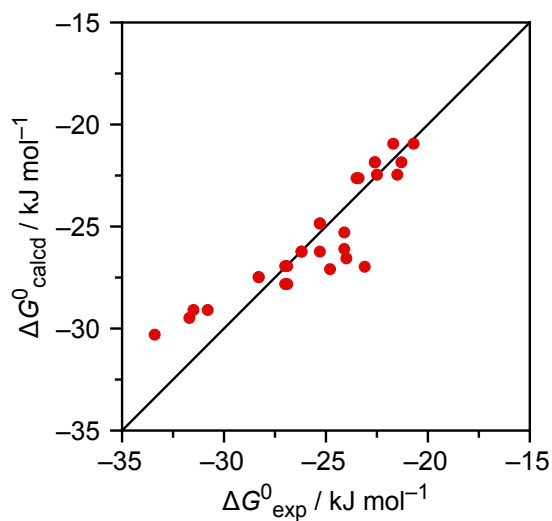

<sup>a</sup>  $e, a, b$ , and  $p$  in  $\text{kJ mol}^{-1}$ .

| Linear Relationship |                               |                                 | $\Delta G^\circ_{\text{calcd}} = g \Delta G^\circ_{\text{tr}} + e E_{\text{T}}(30) + a \alpha + b \beta + p \pi^* a$ |     |     |        |
|---------------------|-------------------------------|---------------------------------|----------------------------------------------------------------------------------------------------------------------|-----|-----|--------|
|                     | $g$                           | $e$                             | $a$                                                                                                                  | $b$ | $p$ | $R^2$  |
|                     | -1.19                         |                                 | -21.59                                                                                                               |     |     | 0.9862 |
| Entry               | $\Delta G^\circ_{\text{exp}}$ | $\Delta G^\circ_{\text{calcd}}$ |                                                                                                                      |     |     |        |
| 37                  | -25.3                         | -22.00                          |                                                                                                                      |     |     |        |
| 41                  | -23.1                         | -26.92                          |                                                                                                                      |     |     |        |
| 64                  | -28.3                         | -25.12                          |                                                                                                                      |     |     |        |
| 65                  | -27.0                         | -23.28                          |                                                                                                                      |     |     |        |
| 66                  | -26.2                         | -22.00                          |                                                                                                                      |     |     |        |
| 67                  | -25.3                         | -22.85                          |                                                                                                                      |     |     |        |
| 68                  | -23.5                         | -24.44                          |                                                                                                                      |     |     |        |
| 69                  | -22.6                         | -24.85                          |                                                                                                                      |     |     |        |
| 77                  | -33.4                         | -28.99                          |                                                                                                                      |     |     |        |
| 78                  | -30.8                         | -27.64                          |                                                                                                                      |     |     |        |
| 79                  | -31.5                         | -27.64                          |                                                                                                                      |     |     |        |
| 80                  | -28.3                         | -25.12                          |                                                                                                                      |     |     |        |
| 81                  | -26.9                         | -23.28                          |                                                                                                                      |     |     |        |
| 82                  | -26.2                         | -22.00                          |                                                                                                                      |     |     |        |
| 83                  | -25.3                         | -22.85                          |                                                                                                                      |     |     |        |
| 84                  | -23.4                         | -24.44                          |                                                                                                                      |     |     |        |
| 85                  | -22.6                         | -24.85                          |                                                                                                                      |     |     |        |
| 86                  | -21.7                         | -25.26                          |                                                                                                                      |     |     |        |
| 94                  | -31.7                         | -32.04                          |                                                                                                                      |     |     |        |
| 95                  | -27.0                         | -28.63                          |                                                                                                                      |     |     |        |
| 96                  | -26.9                         | -28.63                          |                                                                                                                      |     |     |        |
| 97                  | -24.8                         | -27.19                          |                                                                                                                      |     |     |        |
| 98                  | -24.0                         | -26.09                          |                                                                                                                      |     |     |        |
| 99                  | -24.1                         | -25.58                          |                                                                                                                      |     |     |        |
| 100                 | -24.1                         | -25.40                          |                                                                                                                      |     |     |        |
| 101                 | -22.5                         | -25.24                          |                                                                                                                      |     |     |        |
| 102                 | -20.7                         | -25.26                          |                                                                                                                      |     |     |        |
| 108                 | -21.3                         | -24.85                          |                                                                                                                      |     |     |        |
| 111                 | -21.5                         | -25.24                          |                                                                                                                      |     |     |        |

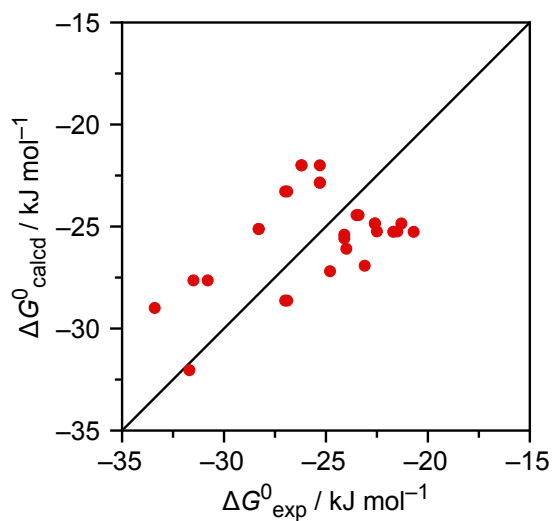

<sup>a</sup>  $e$ ,  $a$ ,  $b$ , and  $p$  in  $\text{kJ mol}^{-1}$ .

| Linear Relationship |                               |                                 | $\Delta G^\circ_{\text{calcd}} = g \Delta G^\circ_{\text{tr}} + e E_{\text{T}}(30) + a \alpha + b \beta + p \pi^*$ <sup>a</sup> |        |     |        |
|---------------------|-------------------------------|---------------------------------|---------------------------------------------------------------------------------------------------------------------------------|--------|-----|--------|
|                     | $g$                           | $e$                             | $a$                                                                                                                             | $b$    | $p$ | $R^2$  |
|                     | -0.42                         |                                 |                                                                                                                                 | -40.37 |     | 0.9950 |
| Entry               | $\Delta G^\circ_{\text{exp}}$ | $\Delta G^\circ_{\text{calcd}}$ |                                                                                                                                 |        |     |        |
| 37                  | -25.3                         | -27.67                          |                                                                                                                                 |        |     |        |
| 41                  | -23.1                         | -26.95                          |                                                                                                                                 |        |     |        |
| 64                  | -28.3                         | -28.25                          |                                                                                                                                 |        |     |        |
| 65                  | -27.0                         | -28.20                          |                                                                                                                                 |        |     |        |
| 66                  | -26.2                         | -27.67                          |                                                                                                                                 |        |     |        |
| 67                  | -25.3                         | -25.39                          |                                                                                                                                 |        |     |        |
| 68                  | -23.5                         | -21.66                          |                                                                                                                                 |        |     |        |
| 69                  | -22.6                         | -20.41                          |                                                                                                                                 |        |     |        |
| 77                  | -33.4                         | -30.74                          |                                                                                                                                 |        |     |        |
| 78                  | -30.8                         | -29.56                          |                                                                                                                                 |        |     |        |
| 79                  | -31.5                         | -29.56                          |                                                                                                                                 |        |     |        |
| 80                  | -28.3                         | -28.25                          |                                                                                                                                 |        |     |        |
| 81                  | -26.9                         | -28.20                          |                                                                                                                                 |        |     |        |
| 82                  | -26.2                         | -27.67                          |                                                                                                                                 |        |     |        |
| 83                  | -25.3                         | -25.39                          |                                                                                                                                 |        |     |        |
| 84                  | -23.4                         | -21.66                          |                                                                                                                                 |        |     |        |
| 85                  | -22.6                         | -20.41                          |                                                                                                                                 |        |     |        |
| 86                  | -21.7                         | -18.97                          |                                                                                                                                 |        |     |        |
| 94                  | -31.7                         | -28.75                          |                                                                                                                                 |        |     |        |
| 95                  | -27.0                         | -27.54                          |                                                                                                                                 |        |     |        |
| 96                  | -26.9                         | -27.54                          |                                                                                                                                 |        |     |        |
| 97                  | -24.8                         | -27.03                          |                                                                                                                                 |        |     |        |
| 98                  | -24.0                         | -26.65                          |                                                                                                                                 |        |     |        |
| 99                  | -24.1                         | -26.15                          |                                                                                                                                 |        |     |        |
| 100                 | -24.1                         | -25.05                          |                                                                                                                                 |        |     |        |
| 101                 | -22.5                         | -21.12                          |                                                                                                                                 |        |     |        |
| 102                 | -20.7                         | -18.97                          |                                                                                                                                 |        |     |        |
| 108                 | -21.3                         | -20.41                          |                                                                                                                                 |        |     |        |
| 111                 | -21.5                         | -21.12                          |                                                                                                                                 |        |     |        |

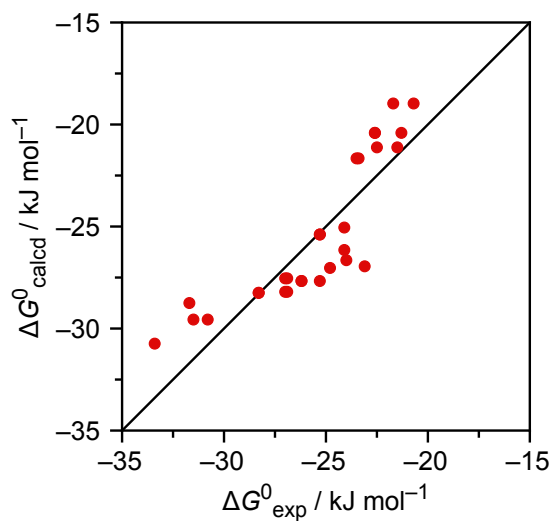

<sup>a</sup>  $e$ ,  $a$ ,  $b$ , and  $p$  in  $\text{kJ mol}^{-1}$ .

| Linear Relationship |                               |                                 | $\Delta G^\circ_{\text{calcd}} = g \Delta G^\circ_{\text{tr}} + e E_{\text{T}}(30) + a \alpha + b \beta + p \pi^*$ <sup>a</sup> |        |       |        |
|---------------------|-------------------------------|---------------------------------|---------------------------------------------------------------------------------------------------------------------------------|--------|-------|--------|
|                     | $g$                           | $e$                             | $a$                                                                                                                             | $b$    | $p$   | $R^2$  |
|                     | -0.50                         |                                 |                                                                                                                                 | -35.86 | -2.65 | 0.9954 |
| Entry               | $\Delta G^\circ_{\text{exp}}$ | $\Delta G^\circ_{\text{calcd}}$ | 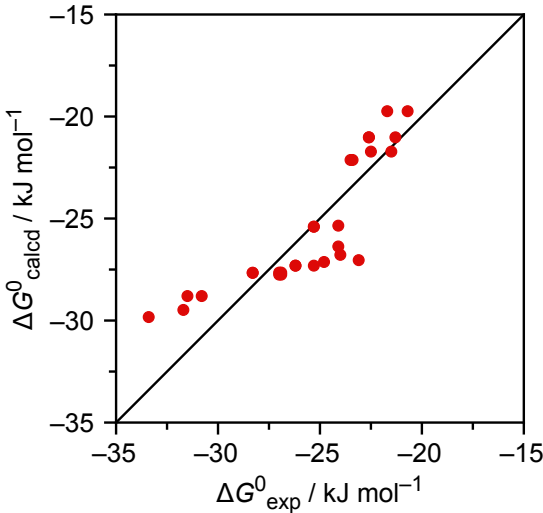                                             |        |       |        |
| 37                  | -25.3                         | -27.31                          |                                                                                                                                 |        |       |        |
| 41                  | -23.1                         | -27.04                          |                                                                                                                                 |        |       |        |
| 64                  | -28.3                         | -27.66                          |                                                                                                                                 |        |       |        |
| 65                  | -27.0                         | -27.65                          |                                                                                                                                 |        |       |        |
| 66                  | -26.2                         | -27.31                          |                                                                                                                                 |        |       |        |
| 67                  | -25.3                         | -25.40                          |                                                                                                                                 |        |       |        |
| 68                  | -23.5                         | -22.13                          |                                                                                                                                 |        |       |        |
| 69                  | -22.6                         | -21.02                          |                                                                                                                                 |        |       |        |
| 77                  | -33.4                         | -29.83                          |                                                                                                                                 |        |       |        |
| 78                  | -30.8                         | -28.80                          |                                                                                                                                 |        |       |        |
| 79                  | -31.5                         | -28.80                          |                                                                                                                                 |        |       |        |
| 80                  | -28.3                         | -27.66                          |                                                                                                                                 |        |       |        |
| 81                  | -26.9                         | -27.65                          |                                                                                                                                 |        |       |        |
| 82                  | -26.2                         | -27.31                          |                                                                                                                                 |        |       |        |
| 83                  | -25.3                         | -25.40                          |                                                                                                                                 |        |       |        |
| 84                  | -23.4                         | -22.13                          |                                                                                                                                 |        |       |        |
| 85                  | -22.6                         | -21.02                          |                                                                                                                                 |        |       |        |
| 86                  | -21.7                         | -19.74                          |                                                                                                                                 |        |       |        |
| 94                  | -31.7                         | -29.48                          |                                                                                                                                 |        |       |        |
| 95                  | -27.0                         | -27.75                          |                                                                                                                                 |        |       |        |
| 96                  | -26.9                         | -27.75                          |                                                                                                                                 |        |       |        |
| 97                  | -24.8                         | -27.13                          |                                                                                                                                 |        |       |        |
| 98                  | -24.0                         | -26.78                          |                                                                                                                                 |        |       |        |
| 99                  | -24.1                         | -26.37                          |                                                                                                                                 |        |       |        |
| 100                 | -24.1                         | -25.35                          |                                                                                                                                 |        |       |        |
| 101                 | -22.5                         | -21.72                          |                                                                                                                                 |        |       |        |
| 102                 | -20.7                         | -19.74                          |                                                                                                                                 |        |       |        |
| 108                 | -21.3                         | -21.02                          |                                                                                                                                 |        |       |        |
| 111                 | -21.5                         | -21.72                          |                                                                                                                                 |        |       |        |

<sup>a</sup>  $e$ ,  $a$ ,  $b$ , and  $p$  in  $\text{kJ mol}^{-1}$ .

Sulfate Complexation /  $E_T(30)$

| Linear Relationship |                                 |                                   | $\Delta G^{\circ}_{\text{calcd}} = g \Delta G^{\circ}_{\text{tr}} + e E_T(30) + a \alpha + b \beta + p \pi^*$ <sup>a</sup> |     |     |        |
|---------------------|---------------------------------|-----------------------------------|----------------------------------------------------------------------------------------------------------------------------|-----|-----|--------|
|                     | $g$                             | $e$                               | $a$                                                                                                                        | $b$ | $p$ | $R^2$  |
|                     | -0.88                           | -0.37                             |                                                                                                                            |     |     | 0.9288 |
| Entry               | $\Delta G^{\circ}_{\text{exp}}$ | $\Delta G^{\circ}_{\text{calcd}}$ | 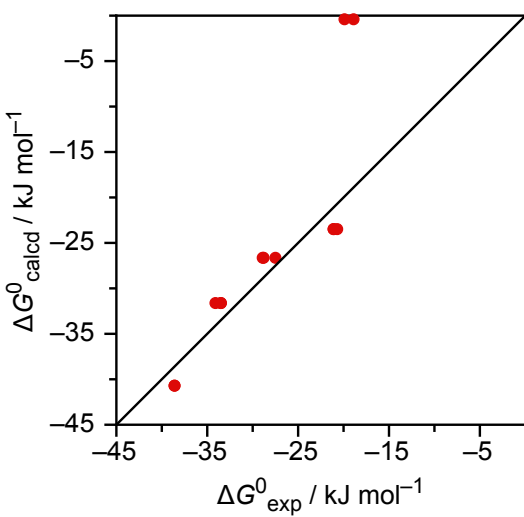                                         |     |     |        |
| 36                  | -34.1                           | -31.61                            |                                                                                                                            |     |     |        |
| 60                  | -38.6                           | -40.70                            |                                                                                                                            |     |     |        |
| 61                  | -33.5                           | -31.61                            |                                                                                                                            |     |     |        |
| 62                  | -28.9                           | -26.64                            |                                                                                                                            |     |     |        |
| 63                  | -21.1                           | -23.48                            |                                                                                                                            |     |     |        |
| 70                  | -38.6                           | -40.70                            |                                                                                                                            |     |     |        |
| 71                  | -33.5                           | -31.61                            |                                                                                                                            |     |     |        |
| 72                  | -28.8                           | -26.64                            |                                                                                                                            |     |     |        |
| 73                  | -21.1                           | -23.48                            |                                                                                                                            |     |     |        |
| 74                  | -19.9                           | -0.40                             |                                                                                                                            |     |     |        |
| 105                 | -18.9                           | -0.40                             |                                                                                                                            |     |     |        |
| 106                 | -27.5                           | -26.64                            |                                                                                                                            |     |     |        |
| 107                 | -20.7                           | -23.48                            |                                                                                                                            |     |     |        |

<sup>a</sup>  $e$ ,  $a$ ,  $b$ , and  $p$  in  $\text{kJ mol}^{-1}$ .

Sulfate Complexation /  $\alpha$ ,  $\beta$ ,  $\pi^*$

| Linear Relationship |                                 |                                   | $\Delta G^{\circ}_{\text{calcd}} = g \Delta G^{\circ}_{\text{tr}} + e E_T(30) + a \alpha + b \beta + p \pi^*$ <sup>a</sup> |       |        |        |
|---------------------|---------------------------------|-----------------------------------|----------------------------------------------------------------------------------------------------------------------------|-------|--------|--------|
|                     | $g$                             | $e$                               | $a$                                                                                                                        | $b$   | $p$    | $R^2$  |
|                     | -1.19                           |                                   | 50.26                                                                                                                      | 11.51 | -76.71 | 0.9998 |
| Entry               | $\Delta G^{\circ}_{\text{exp}}$ | $\Delta G^{\circ}_{\text{calcd}}$ | 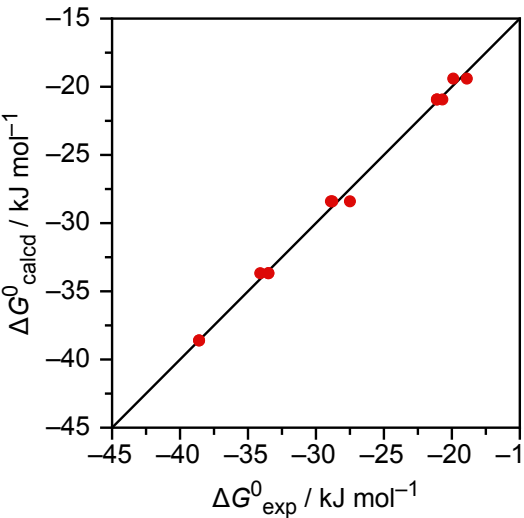                                       |       |        |        |
| 36                  | -34.1                           | -33.67                            |                                                                                                                            |       |        |        |
| 60                  | -38.6                           | -38.60                            |                                                                                                                            |       |        |        |
| 61                  | -33.5                           | -33.67                            |                                                                                                                            |       |        |        |
| 62                  | -28.9                           | -28.40                            |                                                                                                                            |       |        |        |
| 63                  | -21.1                           | -20.93                            |                                                                                                                            |       |        |        |
| 70                  | -38.6                           | -38.60                            |                                                                                                                            |       |        |        |
| 71                  | -33.5                           | -33.67                            |                                                                                                                            |       |        |        |
| 72                  | -28.8                           | -28.40                            |                                                                                                                            |       |        |        |
| 73                  | -21.1                           | -20.93                            |                                                                                                                            |       |        |        |
| 74                  | -19.9                           | -19.40                            |                                                                                                                            |       |        |        |
| 105                 | -18.9                           | -19.40                            |                                                                                                                            |       |        |        |
| 106                 | -27.5                           | -28.40                            |                                                                                                                            |       |        |        |
| 107                 | -20.7                           | -20.93                            |                                                                                                                            |       |        |        |

<sup>a</sup>  $e$ ,  $a$ ,  $b$ , and  $p$  in  $\text{kJ mol}^{-1}$ .

Sulfate Complexation /  $\alpha, \beta$

| Linear Relationship |                                 |                                   | $\Delta G^{\circ}_{\text{calcd}} = g \Delta G^{\circ}_{\text{tr}} + e E_{\text{T}}(30) + a \alpha + b \beta + p \pi^{* \text{ a}}$ |        |     |        |
|---------------------|---------------------------------|-----------------------------------|------------------------------------------------------------------------------------------------------------------------------------|--------|-----|--------|
|                     | $g$                             | $e$                               | $a$                                                                                                                                | $b$    | $p$ | $R^2$  |
|                     | -0.47                           |                                   | 0.30                                                                                                                               | -41.64 |     | 0.9998 |
| Entry               | $\Delta G^{\circ}_{\text{exp}}$ | $\Delta G^{\circ}_{\text{calcd}}$ | 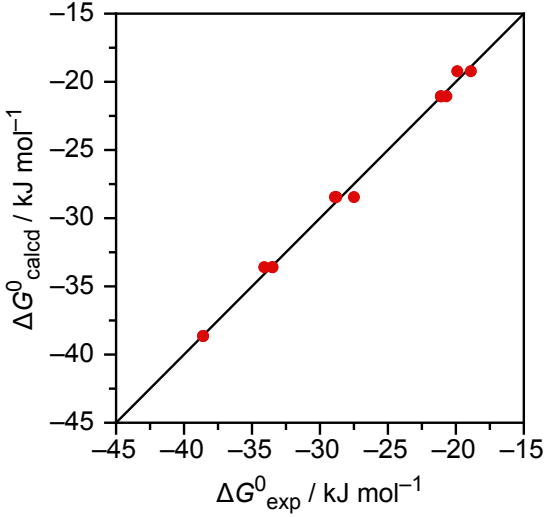                                                 |        |     |        |
| 36                  | -34.1                           | -33.59                            |                                                                                                                                    |        |     |        |
| 60                  | -38.6                           | -38.64                            |                                                                                                                                    |        |     |        |
| 61                  | -33.5                           | -33.59                            |                                                                                                                                    |        |     |        |
| 62                  | -28.9                           | -28.45                            |                                                                                                                                    |        |     |        |
| 63                  | -21.1                           | -21.06                            |                                                                                                                                    |        |     |        |
| 70                  | -38.6                           | -38.64                            |                                                                                                                                    |        |     |        |
| 71                  | -33.5                           | -33.59                            |                                                                                                                                    |        |     |        |
| 72                  | -28.8                           | -28.45                            |                                                                                                                                    |        |     |        |
| 73                  | -21.1                           | -21.06                            |                                                                                                                                    |        |     |        |
| 74                  | -19.9                           | -19.22                            |                                                                                                                                    |        |     |        |
| 105                 | -18.9                           | -19.22                            |                                                                                                                                    |        |     |        |
| 106                 | -27.5                           | -28.45                            |                                                                                                                                    |        |     |        |
| 107                 | -20.7                           | -21.06                            |                                                                                                                                    |        |     |        |

<sup>a</sup>  $e$ ,  $a$ ,  $b$ , and  $p$  in  $\text{kJ mol}^{-1}$ .

Sulfate Complexation /  $\alpha$

| Linear Relationship |                                 |                                   | $\Delta G^{\circ}_{\text{calcd}} = g \Delta G^{\circ}_{\text{tr}} + e E_{\text{T}}(30) + a \alpha + b \beta + p \pi^{* \text{ a}}$ |     |     |        |
|---------------------|---------------------------------|-----------------------------------|------------------------------------------------------------------------------------------------------------------------------------|-----|-----|--------|
|                     | $g$                             | $e$                               | $a$                                                                                                                                | $b$ | $p$ | $R^2$  |
|                     | -1.04                           |                                   | -18.81                                                                                                                             |     |     | 0.9918 |
| Entry               | $\Delta G^{\circ}_{\text{exp}}$ | $\Delta G^{\circ}_{\text{calcd}}$ | 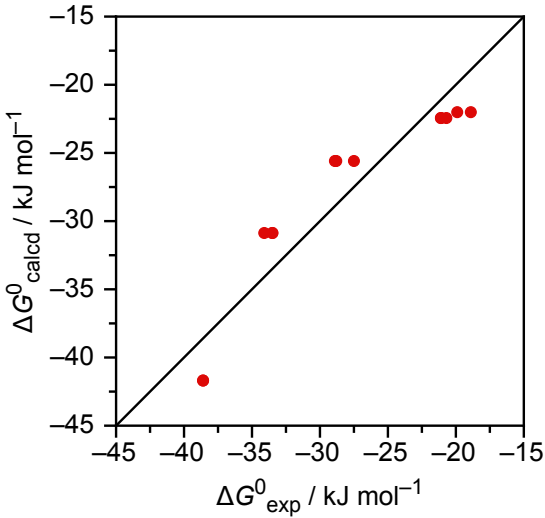                                               |     |     |        |
| 36                  | -34.1                           | -30.87                            |                                                                                                                                    |     |     |        |
| 60                  | -38.6                           | -41.69                            |                                                                                                                                    |     |     |        |
| 61                  | -33.5                           | -30.87                            |                                                                                                                                    |     |     |        |
| 62                  | -28.9                           | -25.59                            |                                                                                                                                    |     |     |        |
| 63                  | -21.1                           | -22.44                            |                                                                                                                                    |     |     |        |
| 70                  | -38.6                           | -41.69                            |                                                                                                                                    |     |     |        |
| 71                  | -33.5                           | -30.87                            |                                                                                                                                    |     |     |        |
| 72                  | -28.8                           | -25.59                            |                                                                                                                                    |     |     |        |
| 73                  | -21.1                           | -22.44                            |                                                                                                                                    |     |     |        |
| 74                  | -19.9                           | -22.01                            |                                                                                                                                    |     |     |        |
| 105                 | -18.9                           | -22.01                            |                                                                                                                                    |     |     |        |
| 106                 | -27.5                           | -25.59                            |                                                                                                                                    |     |     |        |
| 107                 | -20.7                           | -22.44                            |                                                                                                                                    |     |     |        |

<sup>a</sup>  $e$ ,  $a$ ,  $b$ , and  $p$  in  $\text{kJ mol}^{-1}$ .

Sulfate Complexation /  $\beta$

| Linear Relationship |                                 |                                   | $\Delta G^{\circ}_{\text{calcd}} = g \Delta G^{\circ}_{\text{tr}} + e E_{\text{T}}(30) + a \alpha + b \beta + p \pi^{* \text{ a}}$ |        |     |        |
|---------------------|---------------------------------|-----------------------------------|------------------------------------------------------------------------------------------------------------------------------------|--------|-----|--------|
| $g$                 | $e$                             |                                   | $a$                                                                                                                                | $b$    | $p$ | $R^2$  |
| -0.48               |                                 |                                   |                                                                                                                                    | -41.00 |     | 0.9998 |
| Entry               | $\Delta G^{\circ}_{\text{exp}}$ | $\Delta G^{\circ}_{\text{calcd}}$ | 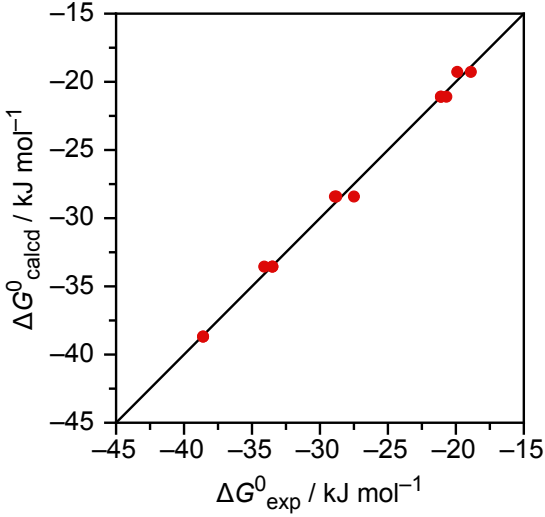                                                 |        |     |        |
| 36                  | -34.1                           | -33.55                            |                                                                                                                                    |        |     |        |
| 60                  | -38.6                           | -38.68                            |                                                                                                                                    |        |     |        |
| 61                  | -33.5                           | -33.55                            |                                                                                                                                    |        |     |        |
| 62                  | -28.9                           | -28.41                            |                                                                                                                                    |        |     |        |
| 63                  | -21.1                           | -21.09                            |                                                                                                                                    |        |     |        |
| 70                  | -38.6                           | -38.68                            |                                                                                                                                    |        |     |        |
| 71                  | -33.5                           | -33.55                            |                                                                                                                                    |        |     |        |
| 72                  | -28.8                           | -28.41                            |                                                                                                                                    |        |     |        |
| 73                  | -21.1                           | -21.09                            |                                                                                                                                    |        |     |        |
| 74                  | -19.9                           | -19.27                            |                                                                                                                                    |        |     |        |
| 105                 | -18.9                           | -19.27                            |                                                                                                                                    |        |     |        |
| 106                 | -27.5                           | -28.41                            |                                                                                                                                    |        |     |        |
| 107                 | -20.7                           | -21.09                            |                                                                                                                                    |        |     |        |

<sup>a</sup>  $e$ ,  $a$ ,  $b$ , and  $p$  in  $\text{kJ mol}^{-1}$ .

Sulfate Complexation /  $\beta$ ,  $\pi^{*}$

| Linear Relationship |                                 |                                   | $\Delta G^{\circ}_{\text{calcd}} = g \Delta G^{\circ}_{\text{tr}} + e E_{\text{T}}(30) + a \alpha + b \beta + p \pi^{* \text{ a}}$ |        |      |        |
|---------------------|---------------------------------|-----------------------------------|------------------------------------------------------------------------------------------------------------------------------------|--------|------|--------|
| $g$                 | $e$                             |                                   | $a$                                                                                                                                | $b$    | $p$  | $R^2$  |
| -0.47               |                                 |                                   |                                                                                                                                    | -41.92 | 0.44 | 0.9998 |
| Entry               | $\Delta G^{\circ}_{\text{exp}}$ | $\Delta G^{\circ}_{\text{calcd}}$ | 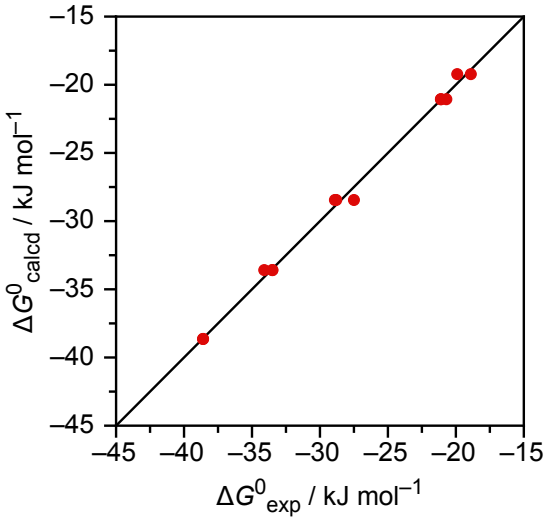                                               |        |      |        |
| 36                  | -34.1                           | -33.59                            |                                                                                                                                    |        |      |        |
| 60                  | -38.6                           | -38.64                            |                                                                                                                                    |        |      |        |
| 61                  | -33.5                           | -33.59                            |                                                                                                                                    |        |      |        |
| 62                  | -28.9                           | -28.45                            |                                                                                                                                    |        |      |        |
| 63                  | -21.1                           | -21.06                            |                                                                                                                                    |        |      |        |
| 70                  | -38.6                           | -38.64                            |                                                                                                                                    |        |      |        |
| 71                  | -33.5                           | -33.59                            |                                                                                                                                    |        |      |        |
| 72                  | -28.8                           | -28.45                            |                                                                                                                                    |        |      |        |
| 73                  | -21.1                           | -21.06                            |                                                                                                                                    |        |      |        |
| 74                  | -19.9                           | -19.22                            |                                                                                                                                    |        |      |        |
| 105                 | -18.9                           | -19.22                            |                                                                                                                                    |        |      |        |
| 106                 | -27.5                           | -28.45                            |                                                                                                                                    |        |      |        |
| 107                 | -20.7                           | -21.06                            |                                                                                                                                    |        |      |        |

<sup>a</sup>  $e$ ,  $a$ ,  $b$ , and  $p$  in  $\text{kJ mol}^{-1}$ .

## References

1. Kubik, S.; Kirchner, R.; Nolting, D.; Seidel, J. A molecular oyster: a neutral anion receptor containing two cyclopeptide subunits with a remarkable sulfate affinity in aqueous solution *J. Am. Chem. Soc.* **2002**, *124*, 12752–12760; <https://doi.org/10.1021/ja026996q>.
2. Otto, S.; Kubik, S. Dynamic combinatorial optimization of a neutral receptor that binds inorganic anions in aqueous solution *J. Am. Chem. Soc.* **2003**, *125*, 7804–7805; <https://doi.org/10.1021/ja0351589>.
3. Rodriguez-Docampo, Z.; Pascu, S. I.; Kubik, S.; Otto, S. Noncovalent interactions within a synthetic receptor can reinforce guest binding *J. Am. Chem. Soc.* **2006**, *128*, 11206–11210; <https://doi.org/10.1021/ja062389h>.
4. Reyheller, C.; Hay, B. P.; Kubik, S. Influence of linker structure on the anion binding affinity of biscyclopeptides *New. J. Chem.* **2007**, *31*, 2095–2102; <https://doi.org/10.1039/b706932d>.
5. Reyheller, C.; Kubik, S. Selective sensing of sulfate in aqueous solution using a fluorescent bis(cyclopeptide) *Org. Lett.* **2007**, *9*, 5271–5274; <https://doi.org/10.1021/ol702386e>.
6. Fiehn, T.; Goddard, R.; Seidel, R. W.; Kubik, S. A cyclopeptide-derived molecular cage for sulfate that closes with a click *Chem. Eur. J.* **2010**, *16*, 7241–7255; <https://doi.org/10.1002/chem.201000308>.
7. Rodriguez-Docampo, Z.; Eugenieva-Ilieva, E.; Reyheller, C.; Belenguer, A. M.; Kubik, S.; Otto, S. Dynamic combinatorial development of a neutral synthetic receptor that binds sulfate with nanomolar affinity in aqueous solution *Chem. Commun.* **2011**, *47*, 9798–9800; <https://doi.org/10.1039/c1cc13451e>.
8. Sommer, F.; Kubik, S. Anion binding of a neutral bis(cyclopeptide) in water/methanol mixtures containing up to 95% of water *Org. Biomol. Chem.* **2014**, *12*, 8851–8860; <https://doi.org/10.1039/c4ob01497a>.
9. Sommer, F.; Marcus, Y.; Kubik, S. Effects of solvent properties on the anion binding of neutral water-soluble bis(cyclopeptides) in water and aqueous solvent mixtures *ACS Omega* **2017**, *2*, 3669–3680; <https://doi.org/10.1021/acsomega.7b00867>.
10. Bartl, J.; Kubik, S. Anion binding of a cyclopeptide-derived molecular cage in aqueous solvent

mixtures *ChemPlusChem* **2020**, 85, 963–969; <https://doi.org/10.1002/cplu.202000255>.

11. Marcus, Y. Gibbs energies of transfer of anions from water to mixed aqueous organic solvents *Chem. Rev.* **2007**, 107, 3880–3897; <https://doi.org/10.1021/cr068045r>.
12. Marcus, Y. The use of chemical probes for the characterization of solvent mixtures. Part 2. Aqueous mixtures *J. Chem. Soc., Perkin Trans. 2* **1994**, 1751–1758; <https://doi.org/10.1039/p29940001751>.
